# Supplementary material for: Metal-free DDQ-mediated oxidative C–O coupling of acetalic sp3C–H bonds with carboxylic acids
Source: Royal Society of Chemistry journal article supplement (doi:10.1039/c4ra08627a), 2014-09-24

## Supplementary information

# Metal-free DDQ-mediated oxidative C-O coupling of acetalic sp<sup>3</sup> C-H bonds with carboxylic acids

Jiangsheng Li,\* Yuan Xue, Dongmei Fu, Daolin Li, Zhiwei Li, \* Weidong Liu,

Huailin Pang, Yuefei Zhang, Zhong Cao and Ling Zhang

*jslichem@gmail.com (Dr J.S. Li) & lizwhn@126.com (Dr Z.W. Li)*

### Contents

- 1) Experimental details and characterization data for all coupled compounds.....1-7
- 2) PDF files of copies of <sup>1</sup>H NMR and <sup>13</sup>C NMR spectra for all coupled compounds  
.....8-24
- 3) A checkCIF report regarding compound **3cm** .....25-28

## General information

All solvents and reagents were purchased from the suppliers and used without further purification. Yields reported are for isolated yields unless otherwise stated.  $^1\text{H}$  NMR (400 MHz) and  $^{13}\text{C}$  NMR (100 MHz) spectra were recorded in  $\text{CDCl}_3$  at room temperature on Bruker Avance III 400 spectrometer. The chemical-shift scale is based on internal TMS. IR spectra were recorded by Thermo Nicolet Avatar 360. MS spectra were performed on a Agilent 1100 series mass spectrometer. Elemental analyses were measured on a Perkin Elmer 2400 series analyzer. TLC analyses were performed on silica gel plates and column chromatography was conducted over silica gel (mesh 200-300) at increased pressure.

## General procedure

A reaction sealed tube was charged with DDQ (1.2 mmol), acid (1.0 mmol) and dry  $\text{CH}_2\text{Cl}_2$  (4 mL), then purged with  $\text{N}_2$ . After the addition of acetal (2.0 mmol) under  $\text{N}_2$ , the reaction mixture was stirred at 80 °C (oil bath) for 12 h. The mixture was allowed to cool at room temperature, ethyl acetate (2 mL) added, and the insoluble residue filtered. The filtrate was diluted with ethyl acetate (20 mL), subsequently washed with aqueous saturated  $\text{NaHCO}_3$  (10 mL  $\times$  3), and dried over anhydrous  $\text{Na}_2\text{SO}_4$ . To the organic phase little silica gel was added. The solvent was roto-evaporated under the reduced pressure, the resulting powder added to the top of a short silica-gel column and purified using petroleum ether/ethyl acetate in a 20:1~10:1 (v/v) ratio as the eluent to afford the desired product.

### Ethane-1,2-diyl dibenzoate (**3aa** & **3al**)

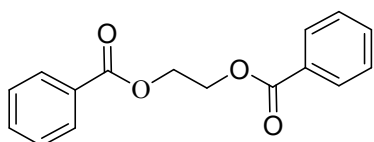

White solid, mp 75~76 °C (lit.<sup>[1]</sup> 73 °C);  $^1\text{H}$  NMR ( $\text{CDCl}_3$ , 400 MHz)  $\delta$  8.08-8.05 (m, 4 H), 7.59-7.55 (m, 2 H), 7.47-7.43 (m, 4 H), 4.67(s, 4 H);  $^{13}\text{C}$  NMR ( $\text{CDCl}_3$ , 100 MHz)  $\delta$  166.43 (2 C), 133.20 (2 C), 129.81 (2 C), 129.74 (4 C), 128.46 (4 C), 62.78 (2 C); IR (KBr)  $\nu_{\text{max}}/\text{cm}^{-1}$  1727, 1707, 1257, 1114, 701; MS (EI) m/z: 270.0, 149.0, 105.1, 77.0; Anal. Calcd for  $\text{C}_{16}\text{H}_{14}\text{O}_4$  C 71.10, H 5.22; Found: C 71.18, H 5.31%.

### 2-(Benzoyloxy)ethyl 2-methylbenzoate (**3ab**)

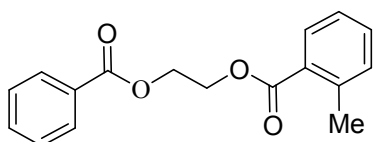

Orange liquid;  $^1\text{H}$  NMR ( $\text{CDCl}_3$ , 400 MHz)  $\delta$  8.07 (d,  $J$  = 8.0 Hz, 2 H), 7.94 (d,  $J$  = 8.0 Hz, 1 H), 7.57 (t,  $J$  = 7.2 Hz, 1 H), 7.46-7.37 (m, 4 H), 7.25-7.22 (m, 1 H), 4.66 (s, 4 H), 2.60 (s, 3 H);  $^{13}\text{C}$  NMR ( $\text{CDCl}_3$ , 100 MHz)  $\delta$  167.37, 166.40, 140.35, 133.19, 132.22, 131.75, 130.78, 129.83, 129.73 (2 C), 129.22, 128.44 (2 C), 125.80, 62.84, 62.49, 21.83; IR (KBr)  $\nu_{\text{max}}/\text{cm}^{-1}$  1723, 1275, 1251, 1112,

739, 711; MS (EI) *m/z*: 284.0, 162.0, 149.0, 119.0, 105.1, 91.0; Anal. Calcd for C<sub>17</sub>H<sub>16</sub>O<sub>4</sub> C 71.82, H 5.67; Found: C 71.70, H 5.80%.

### 2-(Benzoyloxy)ethyl 3-methoxybenzoate (**3ac**)

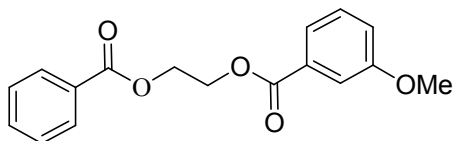

White solid, mp 49~50 °C; <sup>1</sup>H NMR (CDCl<sub>3</sub>, 400 MHz) δ 8.07 (dd, *J* = 8.5, 1.4 Hz, 2 H), 7.66 (dt, *J* = 7.7, 1.3 Hz, 1 H), 7.59-7.55 (m, 2 H), 7.44 (t, *J* = 7.9 Hz, 2 H), 7.35 (t, *J* = 7.9 Hz, 1 H), 7.11 (ddd, *J* = 8.3, 2.7, 0.9 Hz, 1 H), 4.67 (s, 4 H), 3.83 (s, 3 H); <sup>13</sup>C NMR (CDCl<sub>3</sub>, 100 MHz) δ 166.43, 166.31, 159.55, 133.23, 131.08, 129.79, 129.75 (2 C), 129.51, 128.47 (2 C), 122.15, 119.80, 114.03, 62.88, 62.72, 55.46; IR (KBr) *v*<sub>max</sub>/cm<sup>-1</sup> 1721, 1269, 1099, 755, 712; MS (EI) *m/z*: 300.0, 179.0, 149.0, 135.1, 105.1, 77.1; Anal. Calcd for C<sub>17</sub>H<sub>16</sub>O<sub>5</sub> C 67.99, H 5.37; Found: C 67.90, H 5.48%.

### 2-(Benzoyloxy)ethyl 4-methoxybenzoate (**3ad**)

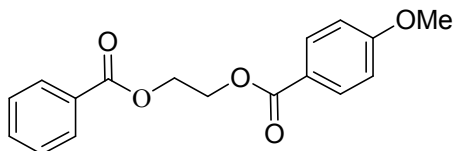

White solid, mp 71~73 °C (lit.<sup>[2]</sup> 96 °C); <sup>1</sup>H NMR (CDCl<sub>3</sub>, 400 MHz) δ 8.06 (dd, *J* = 8.8, 1.6 Hz, 2 H), 8.01 (d, *J* = 8.8 Hz, 2 H), 7.56 (t, *J* = 7.6 Hz, 1 H), 7.44 (t, *J* = 8.0 Hz, 2 H), 6.91 (d, *J* = 8.8 Hz, 2 H), 4.67-4.62 (m, 4 H), 3.85 (s, 3 H); <sup>13</sup>C NMR (CDCl<sub>3</sub>, 100 MHz) δ 166.42, 166.13, 163.54, 133.15, 131.79 (2 C), 129.88, 129.73 (2 C), 128.43 (2 C), 122.23, 113.69 (2 C), 62.87, 62.48, 55.46; IR (KBr) *v*<sub>max</sub>/cm<sup>-1</sup> 1733, 1716, 1254, 1106, 846, 770, 714; MS (EI) *m/z*: 300.0, 179.0, 149.0, 135.1, 105.1, 77.0; Anal. Calcd for C<sub>17</sub>H<sub>16</sub>O<sub>5</sub> C 67.99, H 5.37; Found: C 67.82, H 5.47%.

### 2-(Benzoyloxy)ethyl 4-chlorobenzoate (**3ae & 3cl**)

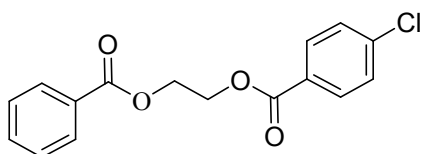

White solid, mp 66~68 °C (lit.<sup>[2]</sup> 88 °C); <sup>1</sup>H NMR (CDCl<sub>3</sub>, 400 MHz) δ 8.06 (dd, *J* = 8.4, 1.2 Hz, 2 H), 7.99 (dt, *J* = 8.4, 1.6 Hz, 2 H), 7.60-7.56 (m, 1 H), 7.47-7.41 (m, 4 H), 4.67 (s, 4 H); <sup>13</sup>C NMR (CDCl<sub>3</sub>, 100 MHz) δ 166.41, 165.58, 139.68, 133.28, 131.15 (2 C), 129.73 (2 C), 128.83 (2 C), 128.49 (2 C), 128.22, 63.04, 62.66; IR (KBr) *v*<sub>max</sub>/cm<sup>-1</sup> 1718, 1266, 1120, 851, 758, 710; MS (EI) *m/z*: 304.0, 185.0, 182.9, 149.0, 141.0, 138.9, 105.1; Anal. Calcd for C<sub>16</sub>H<sub>13</sub>ClO<sub>4</sub> C 63.06, H 4.30; Found: C 63.18, H 4.44%.

### 2-(Benzoyloxy)ethyl 2-chlorobenzoate (**3af & 3am**)

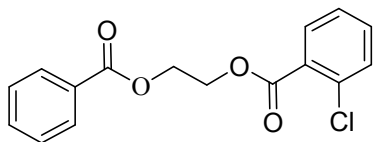

Colorless liquid;  $^1\text{H NMR}$  ( $\text{CDCl}_3$ , 400 MHz)  $\delta$  8.07 (d,  $J = 8.0$  Hz, 2 H), 7.85 (d,  $J = 7.6$  Hz, 1 H), 7.57 (t,  $J = 7.6$  Hz, 1 H), 7.45 (t,  $J = 8.0$  Hz, 4 H), 7.32 (t,  $J = 7.2$  Hz, 1 H), 4.69-4.68 (m, 4 H);  $^{13}\text{C NMR}$  ( $\text{CDCl}_3$ , 100 MHz)  $\delta$  166.39, 165.51, 133.90, 133.22, 132.80, 131.56, 131.16, 129.77 (2 C), 129.73, 128.46 (2 C), 126.66, 63.18, 62.63; IR (KBr)  $\nu_{\text{max}}/\text{cm}^{-1}$  1720, 1247, 1109, 749, 711; MS (EI)  $m/z$ : 304.0, 185.0, 183.0, 149.0, 141.0, 138.9, 105.1; Anal. Calcd for  $\text{C}_{16}\text{H}_{13}\text{ClO}_4$  C 63.06, H 4.30; Found: C 63.19, H 4.42%.

### 2-(Benzoyloxy)ethyl 3,5-dinitrobenzoate (**3ag**)

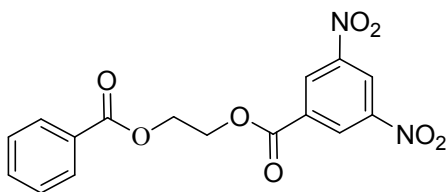

White solid, mp 122~124 °C;  $^1\text{H NMR}$  ( $\text{CDCl}_3$ , 400 MHz)  $\delta$  9.23 (t,  $J = 1.6$  Hz, 1 H), 9.17 (d,  $J = 1.6$  Hz, 2 H), 8.06 (d,  $J = 7.6$  Hz, 2 H), 7.58 (t,  $J = 7.2$  Hz, 1H), 7.46 (t,  $J = 7.6$  Hz, 2 H), 4.82-4.79 (m, 2 H), 4.75-4.72 (m, 2 H);  $^{13}\text{C NMR}$  ( $\text{CDCl}_3$ , 100 MHz)  $\delta$  166.34, 162.41, 148.72 (2 C), 133.50, 133.45, 129.73 (2 C), 129.59 (2 C), 129.48, 128.56 (2 C), 122.60, 64.65, 62.16; IR (KBr)  $\nu_{\text{max}}/\text{cm}^{-1}$  1739, 1717, 1541, 1286, 1260, 1170, 731, 716; MS (EI)  $m/z$ : 360.0, 239.0, 195.0, 166.0, 149.0, 105.1; Anal. Calcd for  $\text{C}_{16}\text{H}_{12}\text{N}_2\text{O}_8$  C 53.34, H 3.36, N 7.78; Found: C 53.22, H 3.27, N 7.69%.

### (E)-2-(cinnamoyloxy)ethyl benzoate (**3ah**)

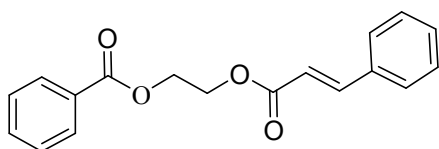

White solid, mp 56~58 °C;  $^1\text{H NMR}$  ( $\text{CDCl}_3$ , 400 MHz)  $\delta$  8.07 (dd,  $J = 8.0, 1.2$  Hz, 2 H), 7.73 (d,  $J = 16.0$  Hz, 1 H), 7.59-7.52 (m, 3 H), 7.45 (t,  $J = 8.0$  Hz, 2 H), 7.40-7.38 (m, 3 H), 6.48 (d,  $J = 16.0$  Hz, 1 H), 4.62-4.60 (m, 2 H), 4.57-4.55 (m, 2 H);  $^{13}\text{C NMR}$  ( $\text{CDCl}_3$ , 100 MHz)  $\delta$  166.76, 166.42, 145.50, 134.29, 133.10, 130.47, 129.85, 129.76 (2 C), 128.93 (2 C), 128.44 (2 C), 128.19 (2 C), 117.55, 62.85, 62.33; IR (KBr)  $\nu_{\text{max}}/\text{cm}^{-1}$  1711, 1450, 1270, 1128, 765, 712; MS (EI)  $m/z$ : 296.0, 149.0, 131.0, 105.0, 77.0; Anal. Calcd for  $\text{C}_{18}\text{H}_{16}\text{O}_4$  C 72.96, H 5.44; Found: C 73.06, H 5.53%.

### 2-(Benzoyloxy)ethyl furan-2-carboxylate (**3ai**)

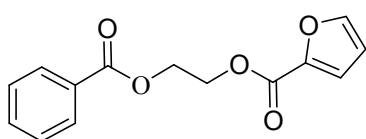

White solid, mp 65~66 °C;  $^1\text{H NMR}$  ( $\text{CDCl}_3$ , 400 MHz)  $\delta$  8.06 (d,  $J = 7.6$  Hz, 2 H), 7.59 (s, 1 H),

7.57 (t,  $J = 8.0$  Hz, 1 H), 7.44 (t,  $J = 8.0$  Hz, 2 H), 7.21 (d,  $J = 3.6$  Hz, 1 H), 6.51 (dd,  $J = 3.2, 1.6$  Hz, 1 H), 4.67-4.62 (m, 4 H);  $^{13}\text{C}$  NMR ( $\text{CDCl}_3$ , 100 MHz)  $\delta$  166.36, 158.44, 148.64, 144.26, 133.19, 129.77, 129.74 (2 C), 128.43 (2 C), 118.48, 111.94, 62.69, 62.58; IR (KBr)  $\nu_{\text{max}}/\text{cm}^{-1}$  1709, 1477, 1318, 1279, 1116, 947, 714; MS (EI)  $m/z$ : 260.0, 149.0, 139.0, 105.0, 95.0, 77.0; Anal. Calcd for  $\text{C}_{14}\text{H}_{12}\text{O}_5$  C 64.61, H 4.65; Found: C 64.70, H 4.78%.

### 2-(Formyloxy)ethyl benzoate (**3aj**)

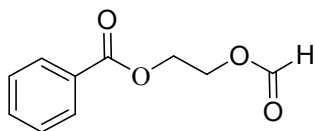

Colorless liquid;  $^1\text{H}$  NMR ( $\text{CDCl}_3$ , 400 MHz)  $\delta$  8.11 (s, 1 H), 8.05 (d,  $J = 7.6$  Hz, 2 H), 7.58 (t,  $J = 7.6$  Hz, 1 H), 7.45 (t,  $J = 7.6$  Hz, 2 H), 4.57-4.51 (m, 4 H);  $^{13}\text{C}$  NMR ( $\text{CDCl}_3$ , 100 MHz)  $\delta$  166.29, 160.68, 133.27, 129.73 (2 C), 129.64, 128.46 (2 C), 62.42, 61.63; IR (KBr)  $\nu_{\text{max}}/\text{cm}^{-1}$  3431, 1719, 1276, 1114, 712; MS (EI)  $m/z$ : 194.0, 148.0, 123.0, 105.0, 77.0; Anal. Calcd for  $\text{C}_{10}\text{H}_{10}\text{O}_4$  C 61.85, H 5.19; Found: C 61.97, H 5.30%.

### 2-((4-Methylbenzoyl)oxy)ethyl 2-methylbenzoate (**3bb**)

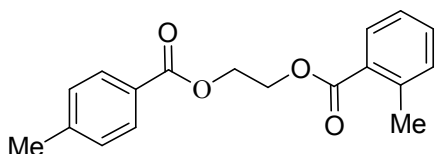

White solid, mp 55~56 °C;  $^1\text{H}$  NMR ( $\text{CDCl}_3$ , 400 MHz)  $\delta$  7.96-7.93 (m, 3 H), 7.40 (t,  $J = 7.6$  Hz, 1 H), 7.26-7.23 (m, 4 H), 4.64 (s, 4 H), 2.60 (s, 3 H), 2.40 (s, 3 H);  $^{13}\text{C}$  NMR ( $\text{CDCl}_3$ , 100 MHz)  $\delta$  167.40, 166.48, 143.93, 140.35, 132.23, 131.75, 130.80, 129.77 (2 C), 129.24, 129.18 (2 C), 127.07, 125.81, 62.67, 62.56, 21.87, 21.73; IR (KBr)  $\nu_{\text{max}}/\text{cm}^{-1}$  1724, 1283, 1254, 1086, 751, 738; MS (EI)  $m/z$ : 298.0, 163.0, 119.0, 91.0; Anal. Calcd for  $\text{C}_{18}\text{H}_{18}\text{O}_4$  C 72.47, H 6.08; Found: C 72.56, H 6.20%.

### 2-((4-Methylbenzoyl)oxy)ethyl 2-methoxybenzoate (**3bk**)

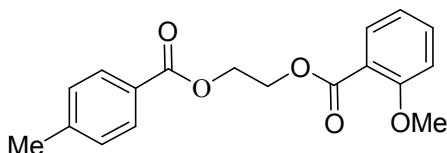

Yellow liquid;  $^1\text{H}$  NMR ( $\text{CDCl}_3$ , 400 MHz)  $\delta$  7.96 (d,  $J = 8.4$  Hz, 2 H), 7.81 (dd,  $J = 8.0, 1.6$  Hz, 1 H), 7.47 (td,  $J = 8.0, 1.6$  Hz, 1 H), 7.28-7.23 (m, 2 H), 6.99-6.95 (m, 2 H), 4.632 (s, 4 H), 3.86 (s, 3 H), 2.40 (s, 3 H);  $^{13}\text{C}$  NMR ( $\text{CDCl}_3$ , 100 MHz)  $\delta$  166.51, 165.93, 159.36, 143.86, 133.80, 131.76, 129.79 (2 C), 129.14 (2 C), 127.14, 120.15, 119.62, 112.03, 62.66, 62.55, 55.95, 21.73; IR (KBr)  $\nu_{\text{max}}/\text{cm}^{-1}$  1716, 1277, 1251, 1112, 1084, 754; MS (EI)  $m/z$ : 314.0, 179.0, 163.0, 135.1, 119.0, 91.0. Anal. Calcd for  $\text{C}_{18}\text{H}_{18}\text{O}_5$  C 68.78, H 5.77; Found: C 68.89, H 5.88%.

2-((4-Chlorobenzoyl)oxy)ethyl 4-methylbenzoate (**3be**)

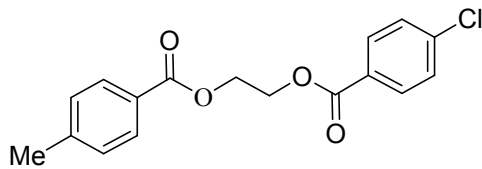

White solid, mp 134~135 °C; <sup>1</sup>H NMR (CDCl<sub>3</sub>, 400 MHz) δ 7.98 (d, *J* = 8.4 Hz, 2 H), 7.94 (d, *J* = 8.0 Hz, 2 H), 7.41 (d, *J* = 8.4 Hz, 2 H), 7.24 (d, *J* = 8.0 Hz, 2 H), 4.65 (s, 4 H), 2.40 (s, 3 H); <sup>13</sup>C NMR (CDCl<sub>3</sub>, 100 MHz) δ 166.44, 165.55, 143.97, 139.64, 131.13 (2 C), 129.75 (2 C), 129.18 (2 C), 128.80 (2 C), 128.29, 127.03, 63.07, 62.45, 21.71; IR (KBr)  $\nu_{\max}/\text{cm}^{-1}$  1716, 1269, 1091, 752; MS (EI) *m/z*: 318.0, 185.0, 182.9, 163.0, 141.0, 138.9, 119.0, 91.0; Anal. Calcd for C<sub>17</sub>H<sub>15</sub>ClO<sub>4</sub> C 64.06, H 4.74; Found: C 64.13, H 4.63%.

2-((4-Chlorobenzoyl)oxy)ethyl 2-methylbenzoate (**3cb**)

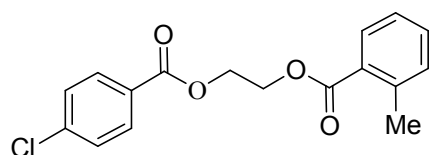

Pale yellow liquid; <sup>1</sup>H NMR (CDCl<sub>3</sub>, 400 MHz) δ 7.99 (d, *J* = 8.4 Hz, 2 H), 7.93 (d, *J* = 8.0 Hz, 1 H), 7.41 (d, *J* = 8.0 Hz, 2 H), 7.39-7.34 (m, 2 H), 7.26-7.22 (m, 1 H), 4.65 (s, 4 H), 2.59 (s, 3 H); <sup>13</sup>C NMR (CDCl<sub>3</sub>, 100 MHz) δ 167.30, 165.53, 140.36, 139.68, 132.28, 131.78, 131.12 (2 C), 130.74, 129.14, 128.82 (2 C), 128.26, 125.82, 63.09, 62.35, 21.83; IR (KBr)  $\nu_{\max}/\text{cm}^{-1}$  1724, 1254, 1090, 854, 758, 740; MS (EI) *m/z*: 318.0, 185.0, 182.9, 162.0, 141.0, 138.9, 118.0, 111.0, 91.0; Anal. Calcd for C<sub>17</sub>H<sub>15</sub>ClO<sub>4</sub> C 64.06, H 4.74; Found: C 64.19, H 4.87%.

2-((4-Chlorobenzoyl)oxy)ethyl 2-methoxybenzoate (**3ck**)

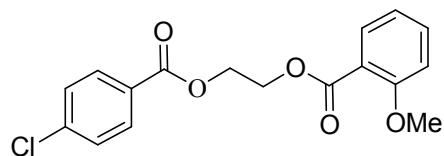

Pale yellow liquid; <sup>1</sup>H NMR (CDCl<sub>3</sub>, 400 MHz) δ 8.00 (d, *J* = 8.8 Hz, 2 H), 7.80 (dd, *J* = 8.0, 2.0 Hz, 1 H), 7.50-7.46 (m, 1 H), 7.41 (d, *J* = 8.4 Hz, 2 H), 6.99-6.96 (m, 2 H), 4.64 (s, 4 H), 3.86 (s, 3 H); <sup>13</sup>C NMR (CDCl<sub>3</sub>, 100 MHz) δ 165.87, 165.56, 159.36, 139.62, 133.86, 131.71, 131.16 (2 C), 128.79 (2 C), 128.33, 120.17, 119.53, 112.05, 63.09, 62.34, 55.95; IR (KBr)  $\nu_{\max}/\text{cm}^{-1}$  1725, 1274, 1247, 1091, 850, 758; MS (EI) *m/z*: 334.0, 185.0, 182.9, 179.0, 141.0, 138.9, 135.1, 111.0; Anal. Calcd for C<sub>17</sub>H<sub>15</sub>ClO<sub>5</sub> C 61.00, H 4.52; Found: C 61.12, H 4.65%.

2-((4-Chlorobenzoyl)oxy)ethyl 2-chlorobenzoate (**3cf & 3cm**)

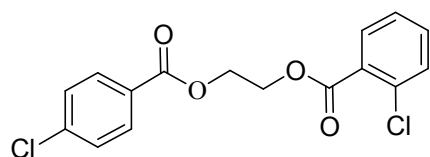

Pale pink solid, mp 53~54 °C; <sup>1</sup>H NMR (CDCl<sub>3</sub>, 400 MHz) δ 8.05-7.99 (m, 2 H), 7.88-7.83 (m, 1 H), 7.46-7.40 (m, 4 H), 7.35-7.29 (m, 1H) , 4.70-

4.65 (m, 4 H);  $^{13}\text{C}$  NMR ( $\text{CDCl}_3$ , 100 MHz)  $\delta$  165.52, 165.49, 139.70, 133.86, 132.83, 131.52, 131.17 (2 C), 129.70, 128.85, 128.82 (2 C), 128.20, 126.68, 63.04, 62.87; IR (KBr)  $\nu_{\text{max}}/\text{cm}^{-1}$  1735, 1718, 1290, 1249, 1109, 758, 749; MS (EI)  $m/z$ : 337.9, 183.0, 141.0, 138.9, 111.0, 75.0; Anal. Calcd for  $\text{C}_{16}\text{H}_{12}\text{Cl}_2\text{O}_4$  C 56.66, H 3.57; Found: C 56.58, H 3.67%.

Ethane-1,2-diyl bis(4-chlorobenzoate) (**3ce**)

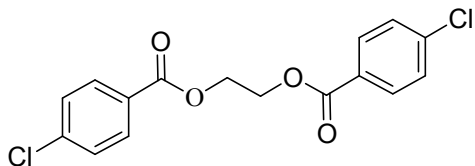

White solid, mp 152~153 °C (lit.<sup>[1]</sup> 140 °C);  $^1\text{H}$  NMR ( $\text{CDCl}_3$ , 400 MHz)  $\delta$  7.98 (d,  $J = 8.8$  Hz, 4 H), 7.42 (d,  $J = 8.4$  Hz, 4 H), 4.657 (s, 4 H);  $^{13}\text{C}$  NMR ( $\text{CDCl}_3$ , 100 MHz)  $\delta$  165.52 (2 C), 139.74 (2 C), 131.11 (4 C), 128.84 (4 C), 128.19 (2 C), 62.88 (2 C); IR (KBr)  $\nu_{\text{max}}/\text{cm}^{-1}$  1717, 1270, 1113, 860, 760; MS (EI)  $m/z$ : 337.9, 185.0, 182.9, 141.0, 138.9, 111.0; Anal. Calcd for  $\text{C}_{16}\text{H}_{12}\text{Cl}_2\text{O}_4$  C 56.66, H 3.57; Found: C 56.54, H 3.68%.

[1] Heim, Harold C.; J. Org. Chem., 1944, 9, 299-301.

[2] Safiev, O. G.; Doklady Akademii Nauk SSSR, 1990, 310(4), 889-893

2) PDF files of copies of  $^1\text{H}$  NMR and  $^{13}\text{C}$  NMR spectra for all coupled compounds

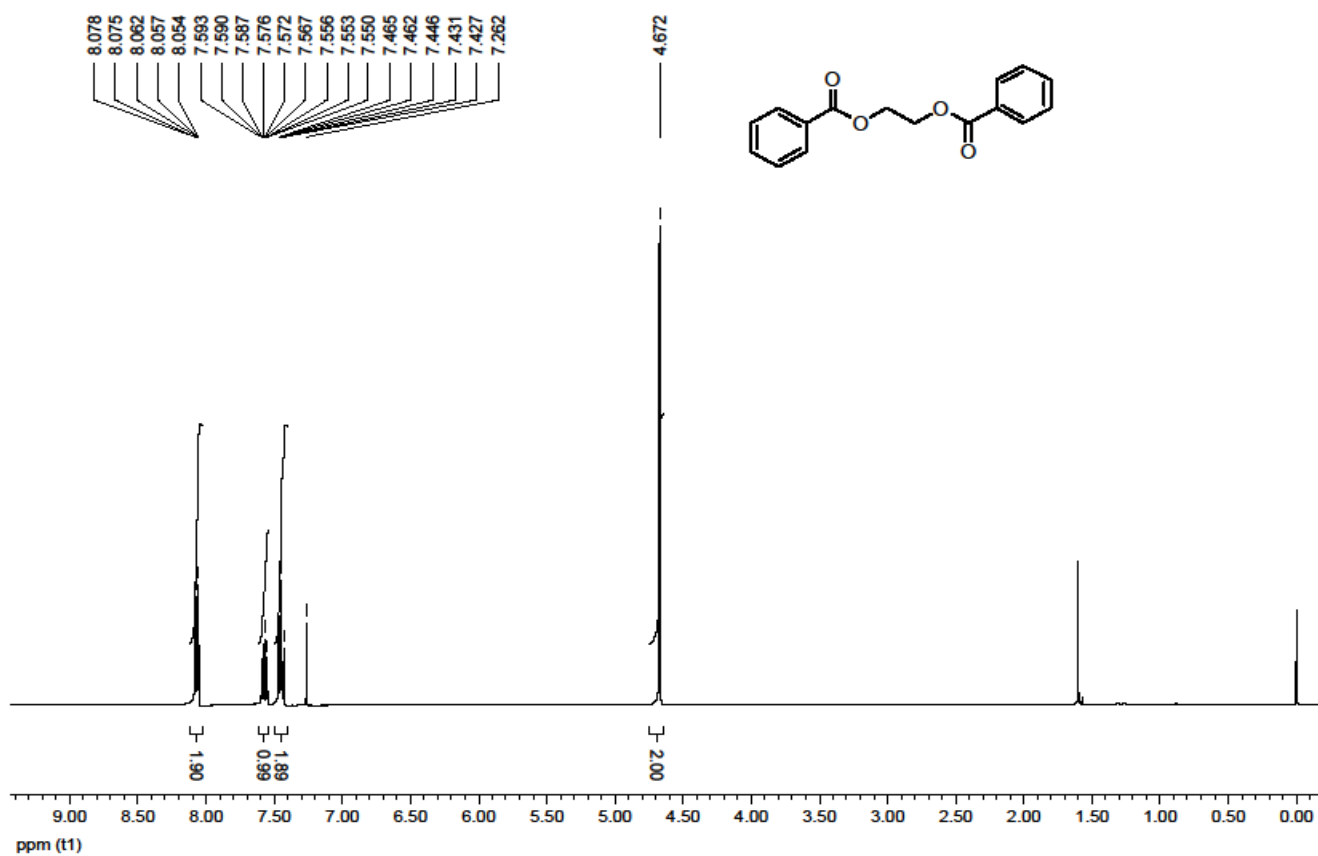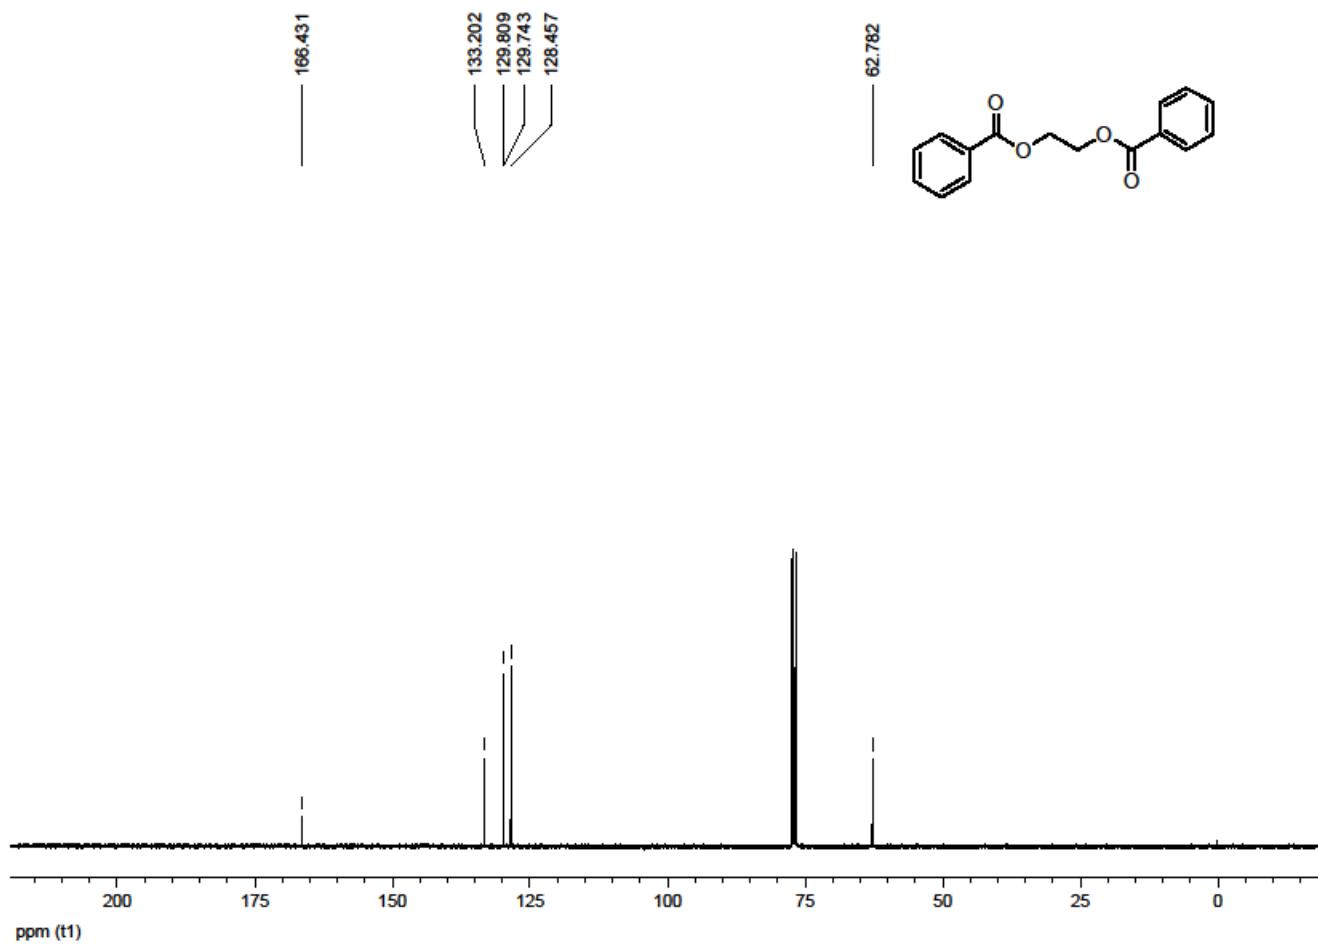



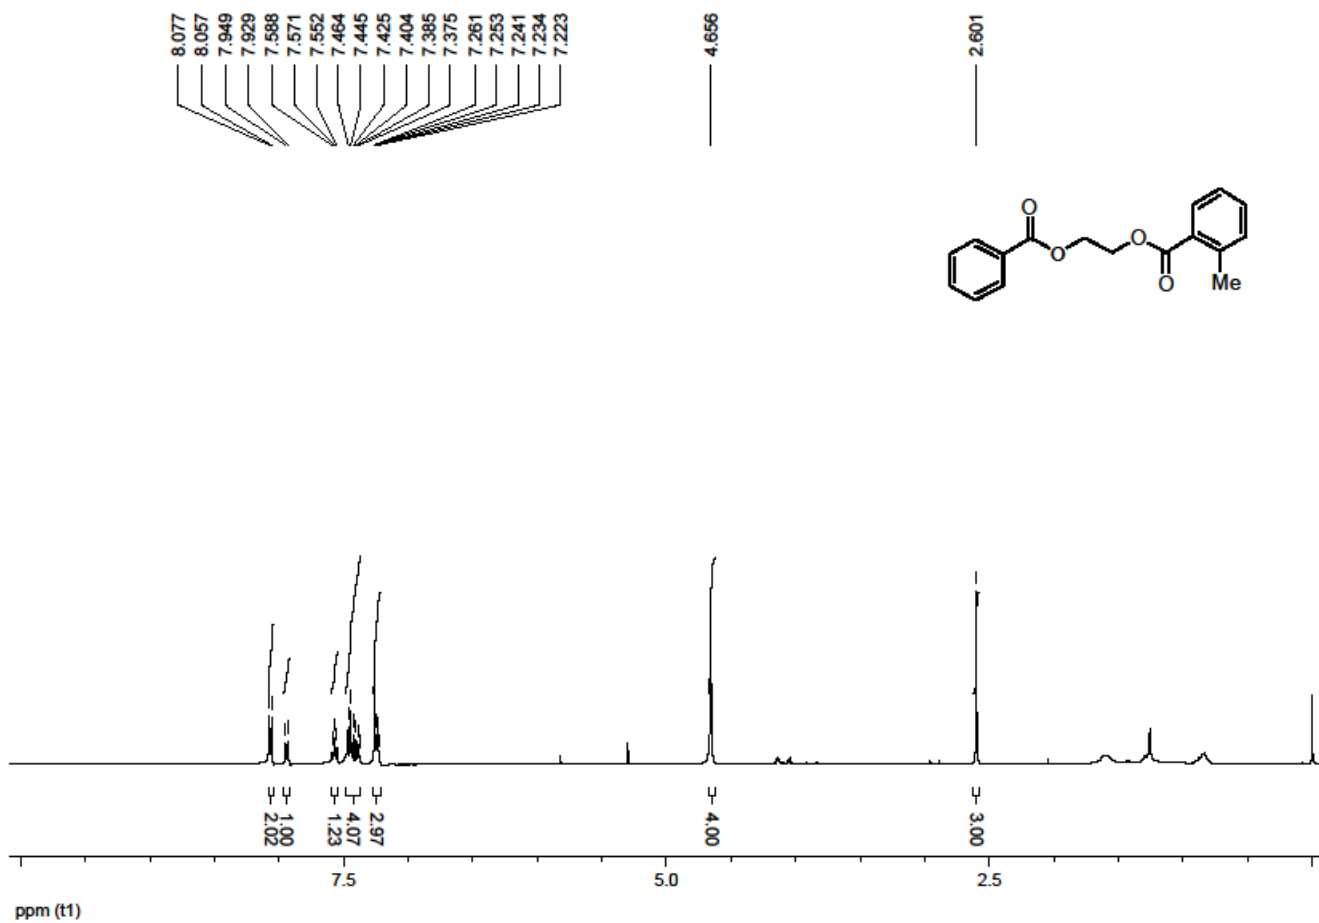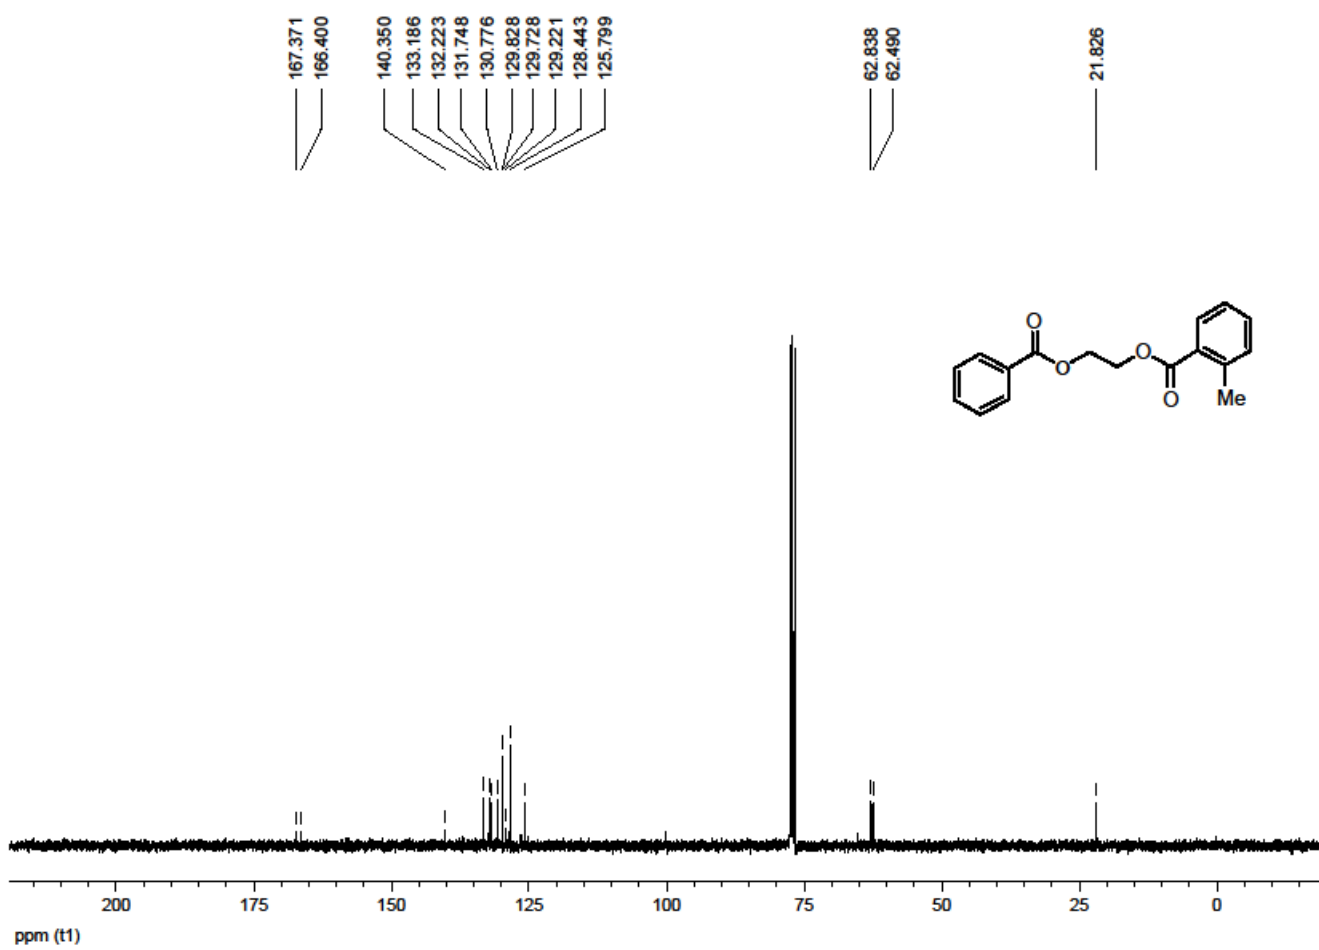

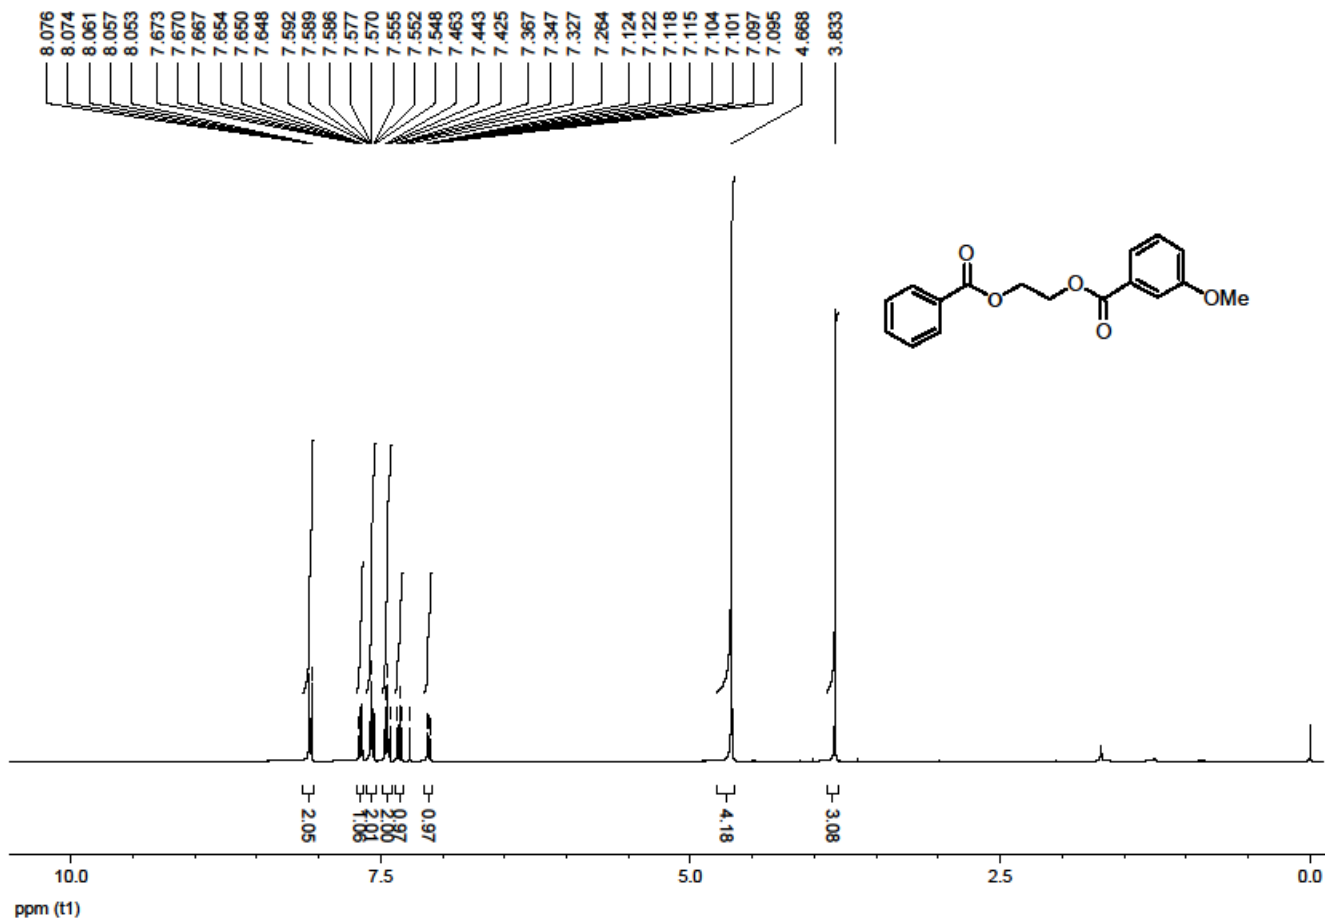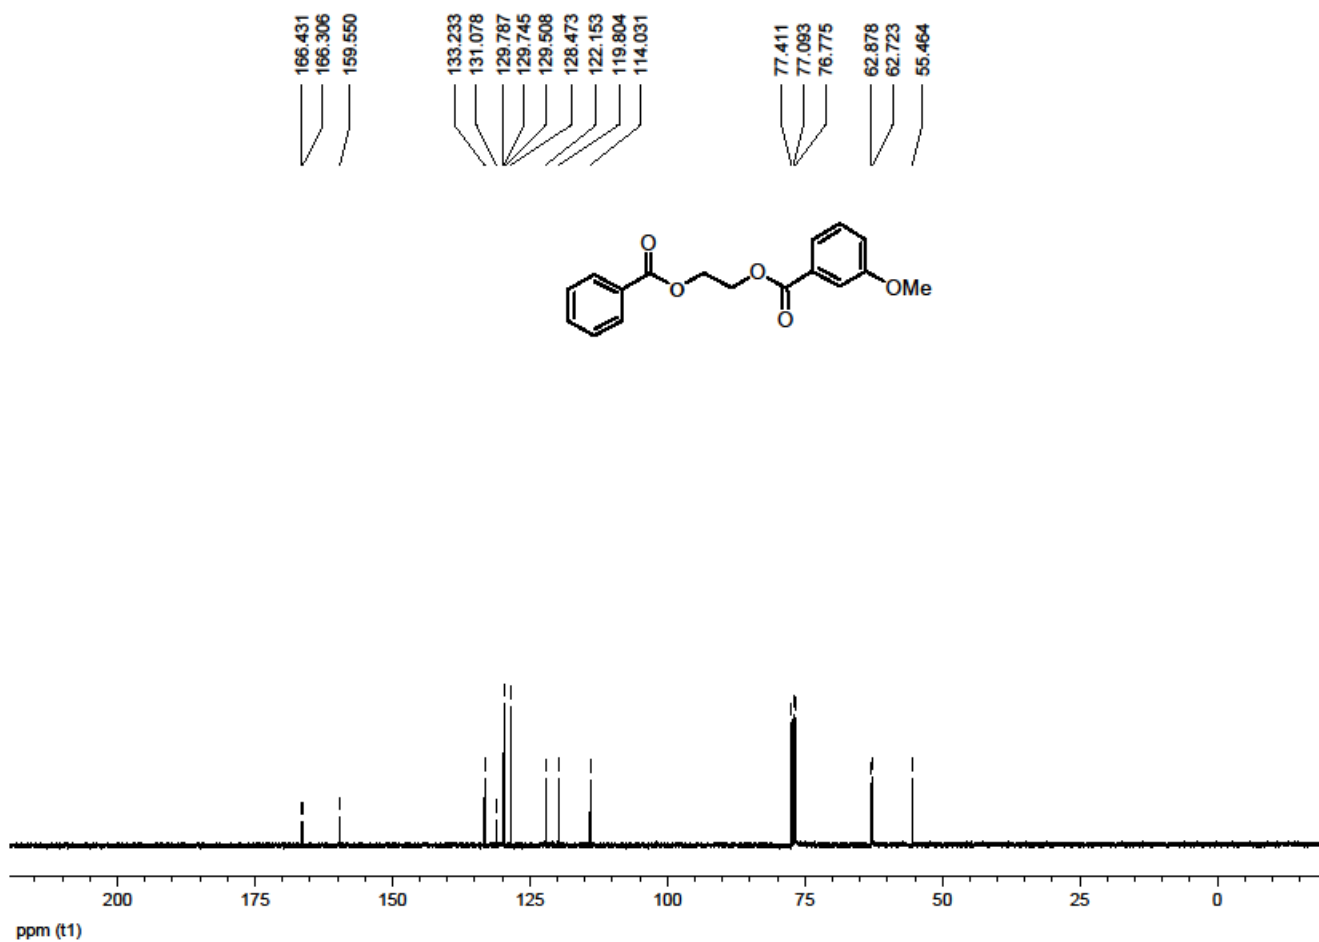

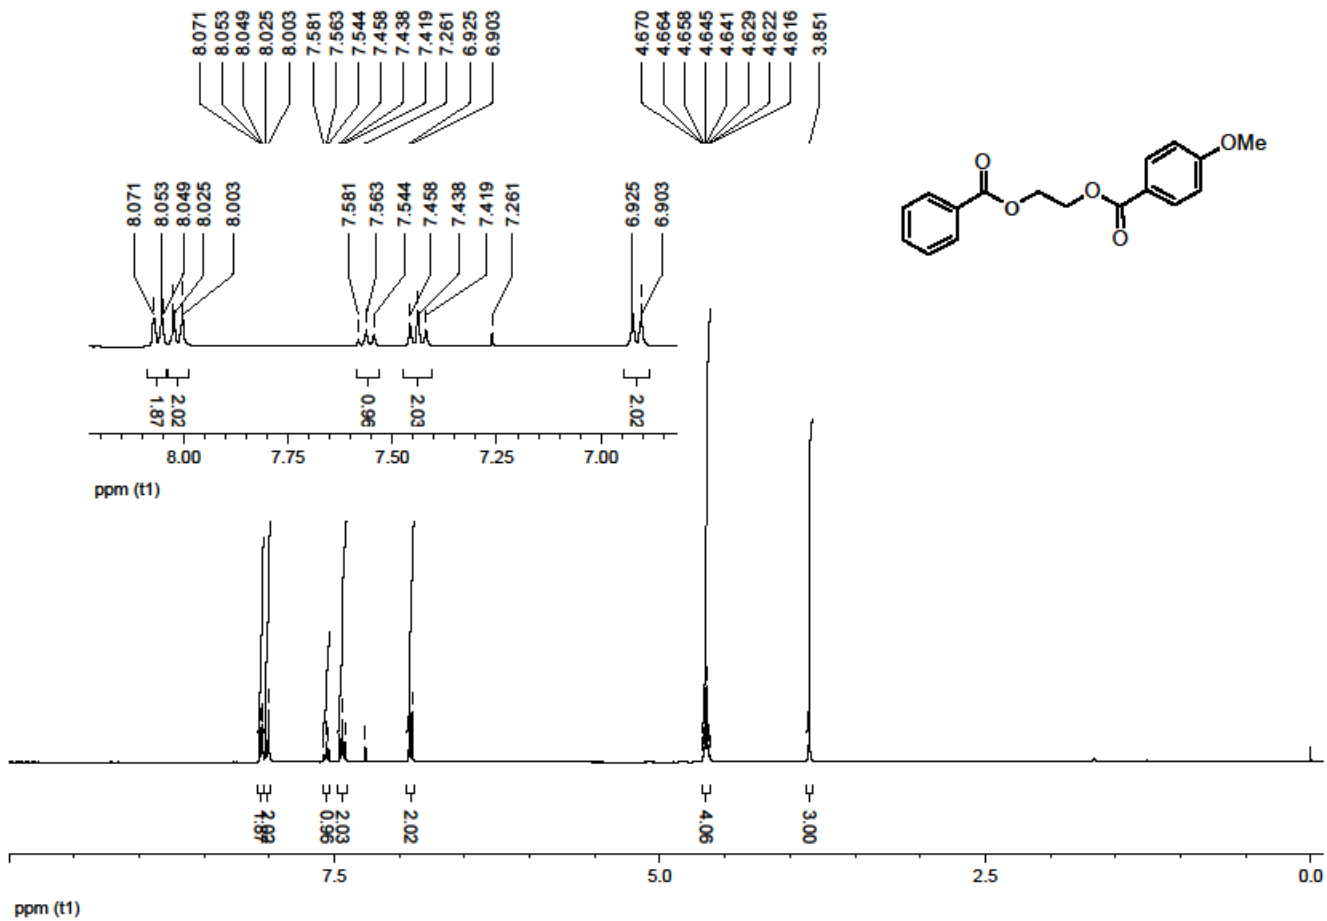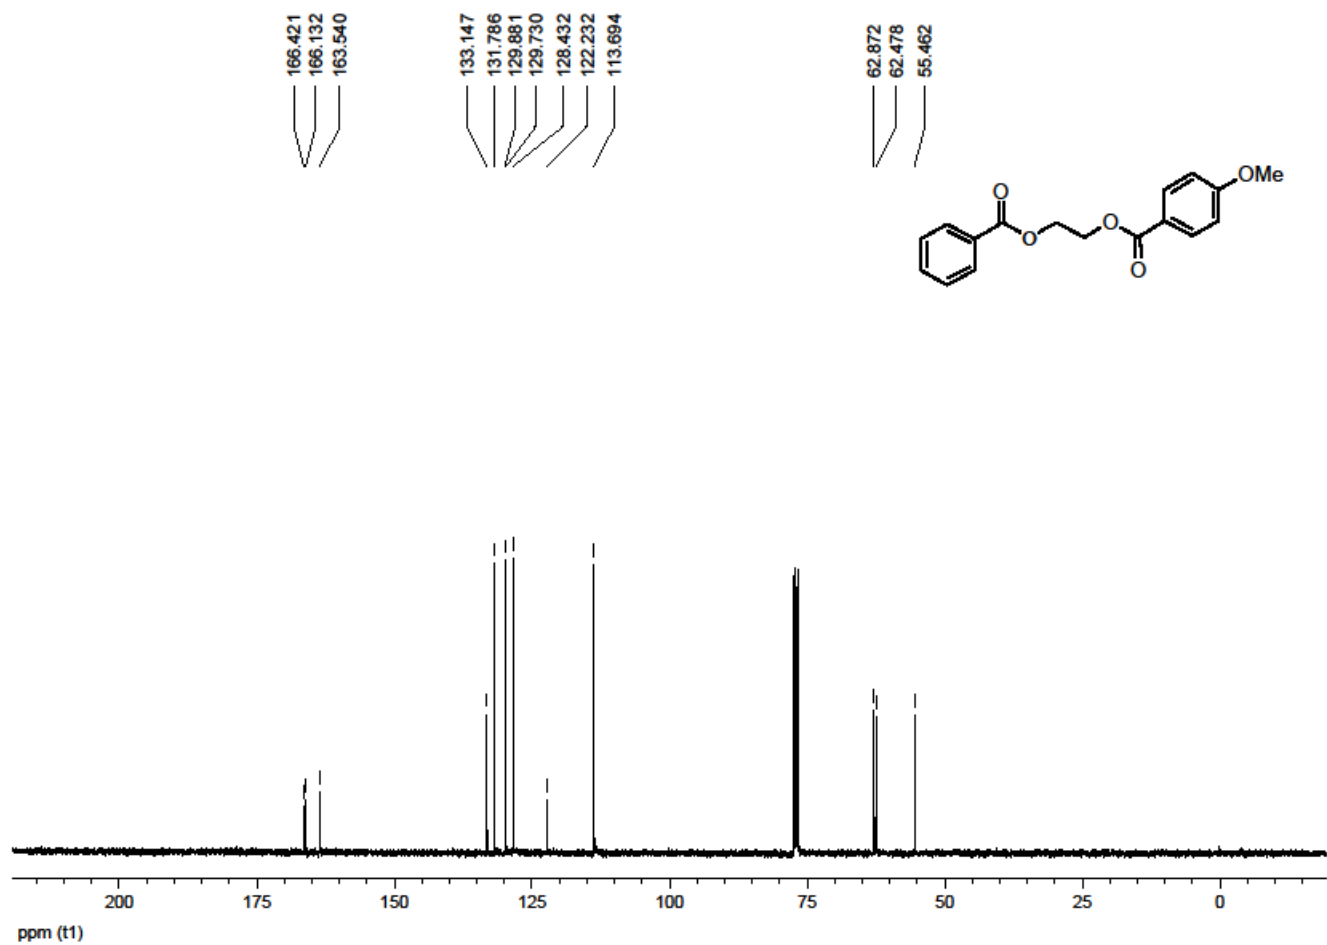

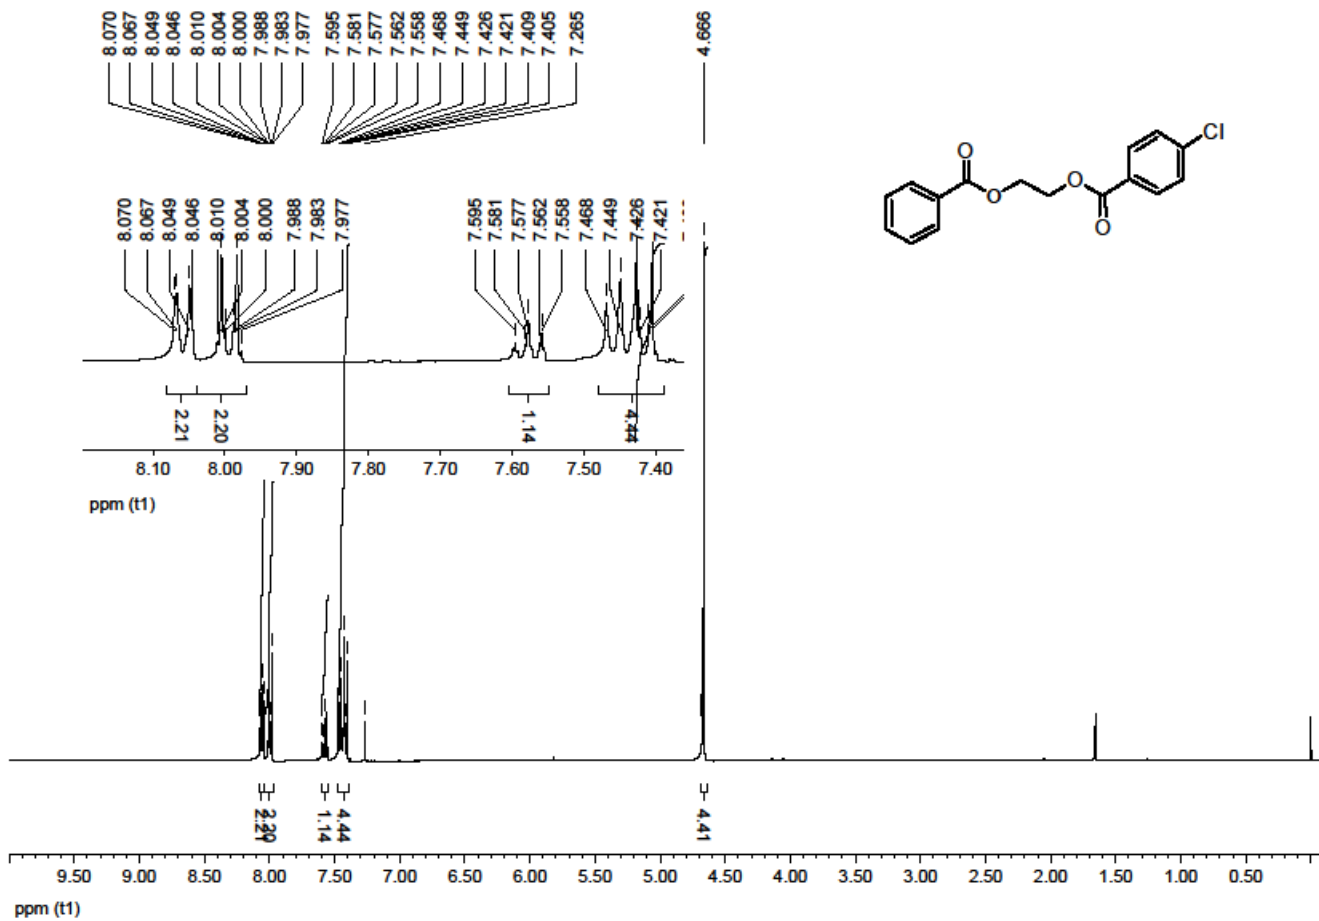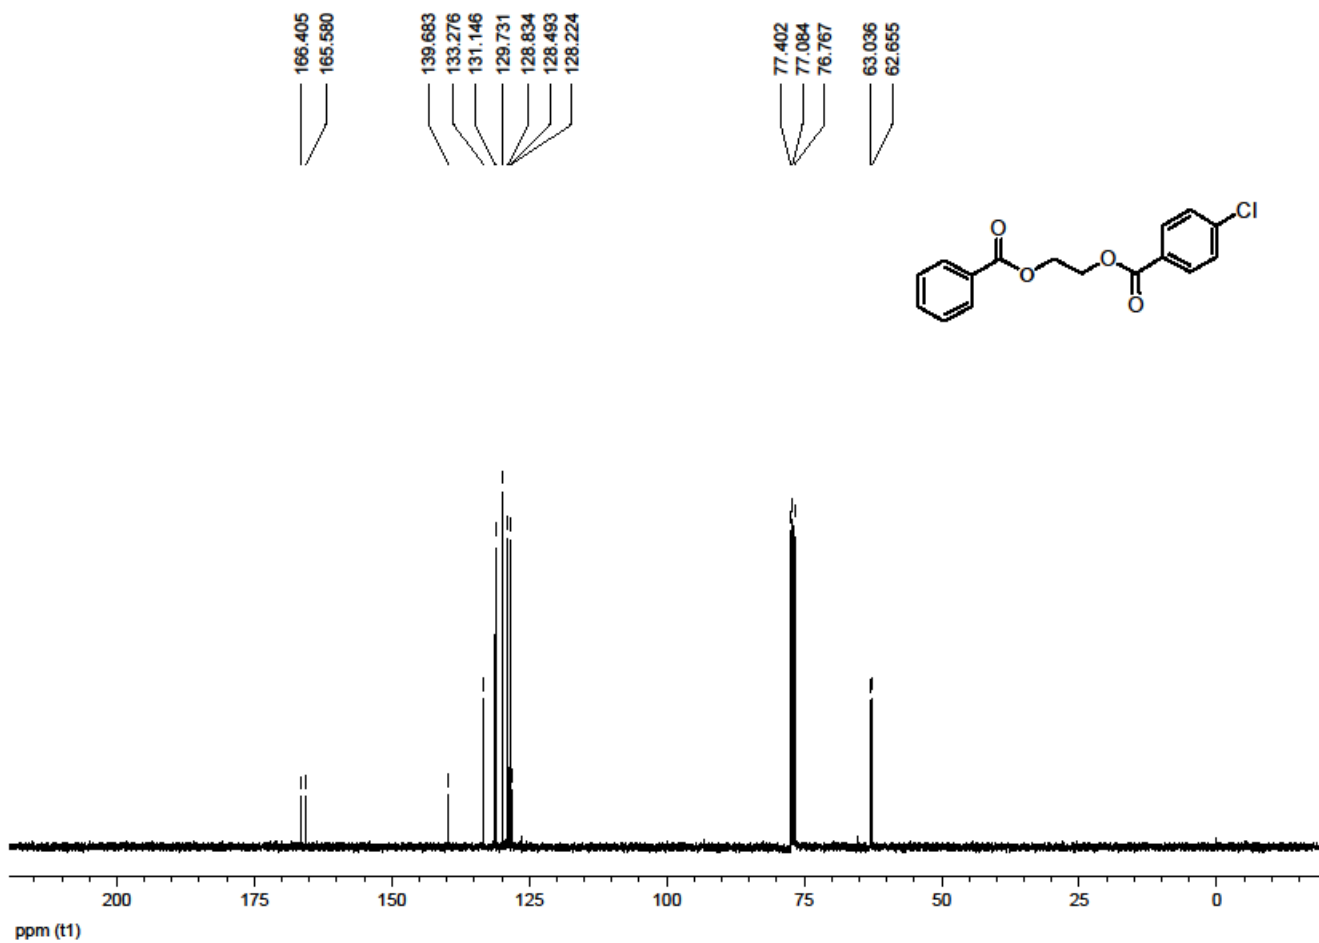

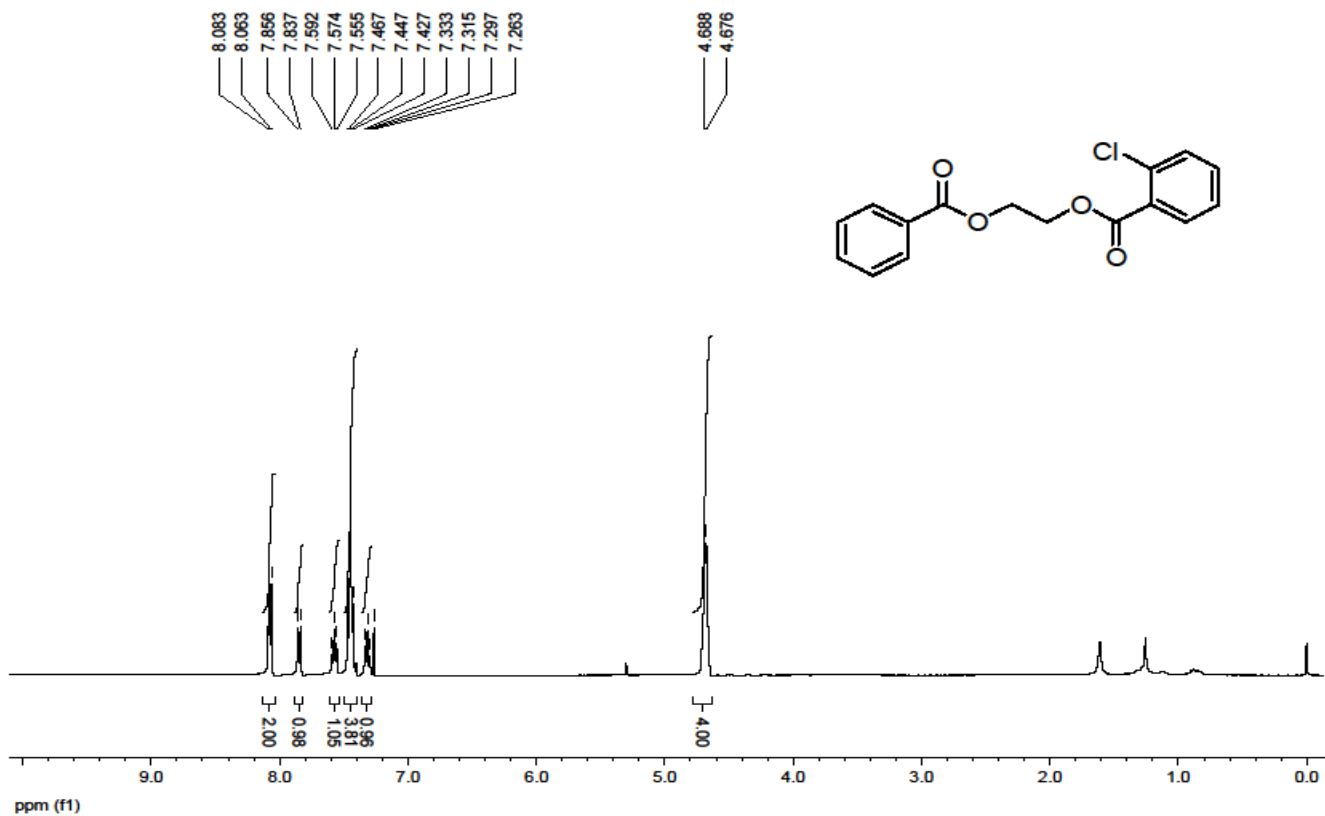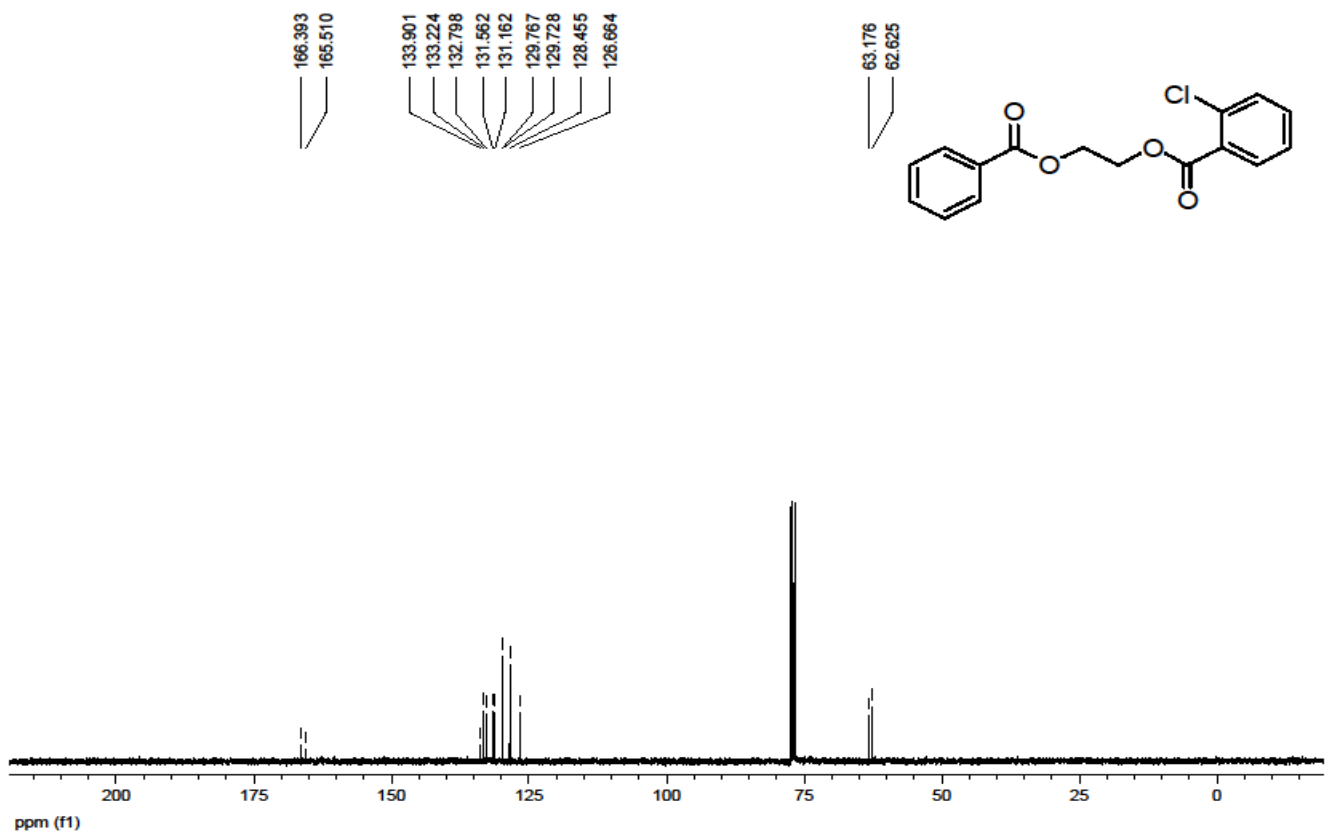

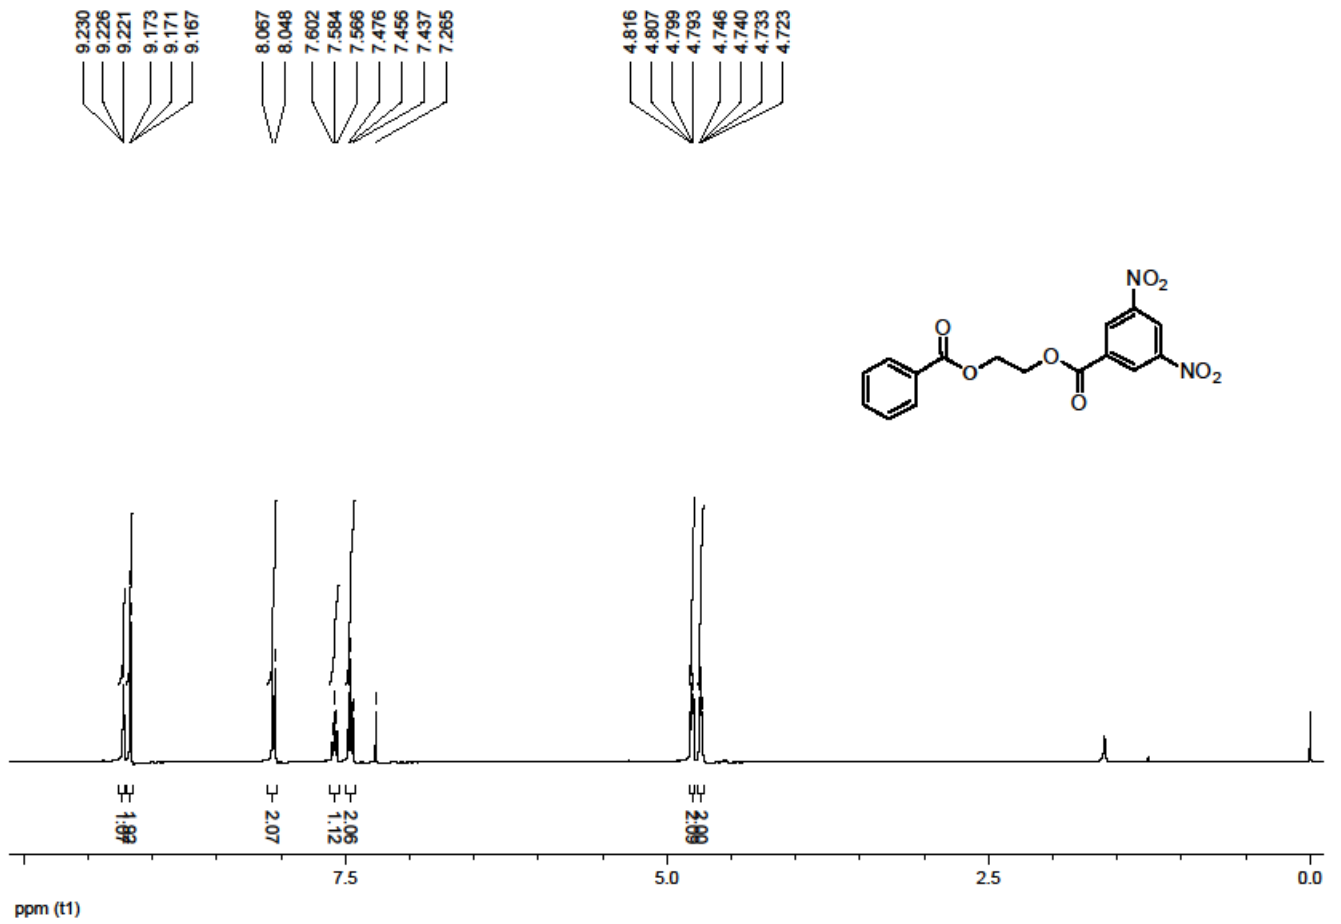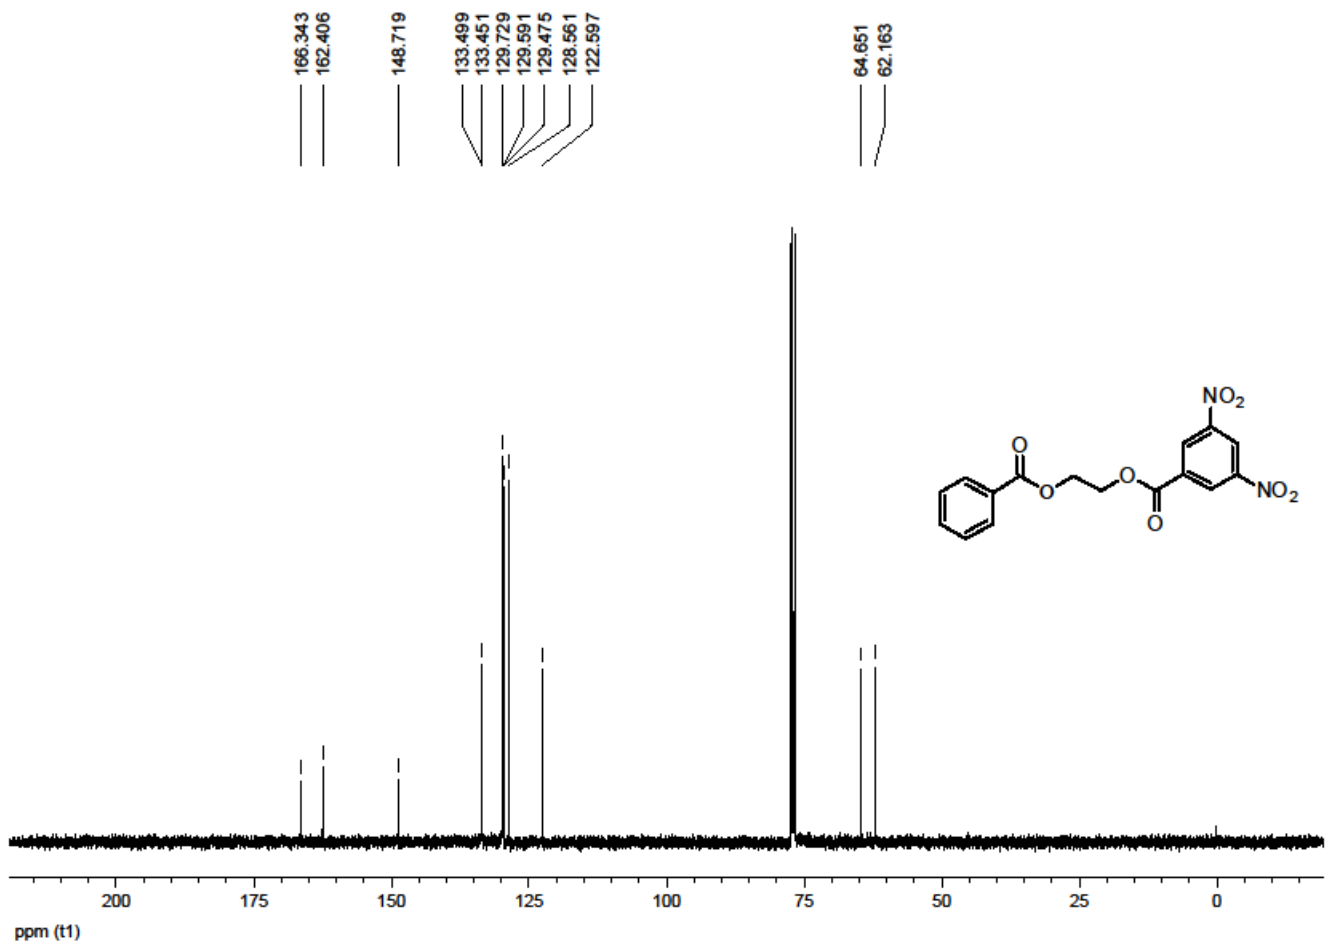

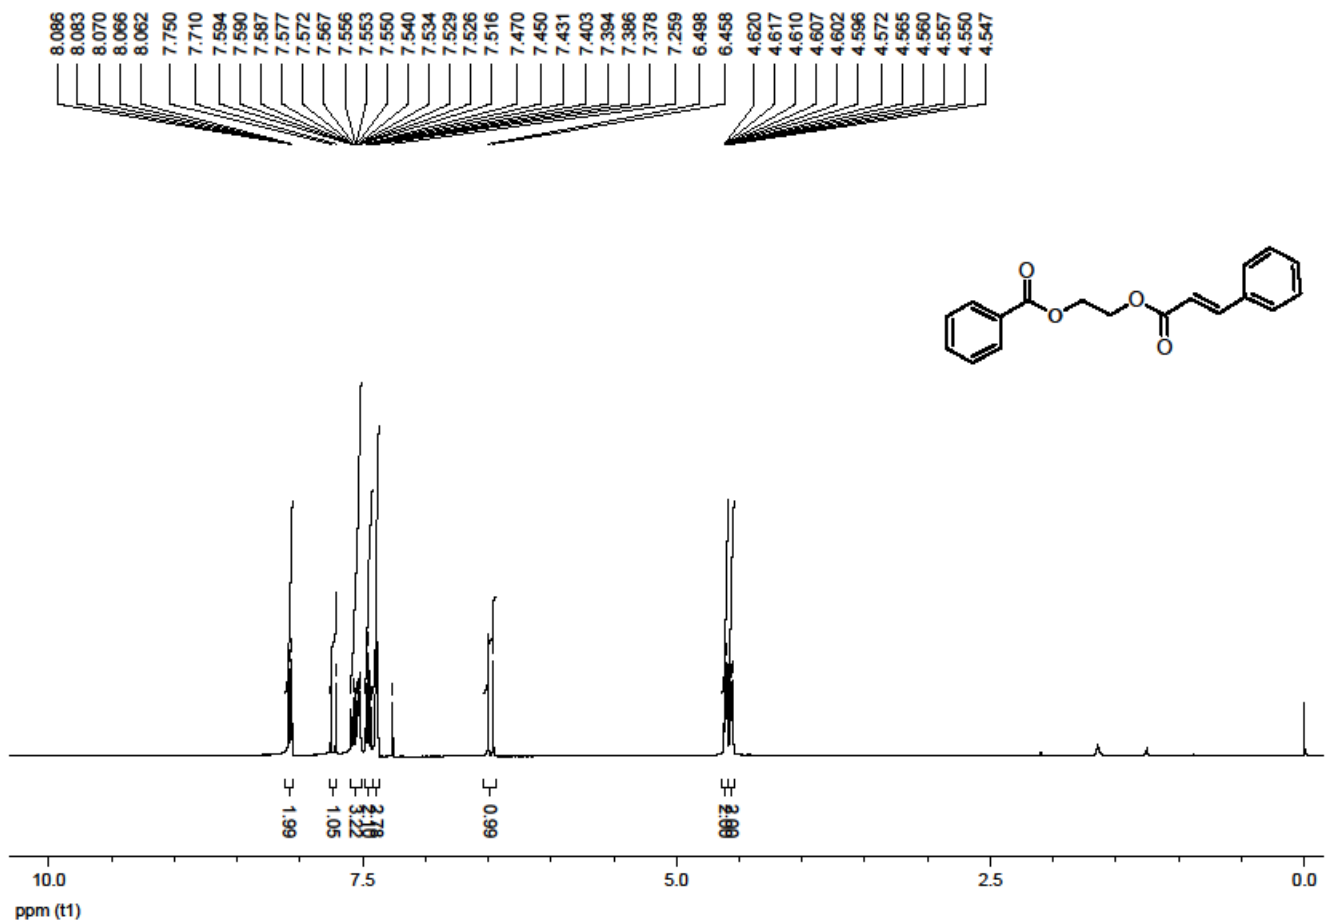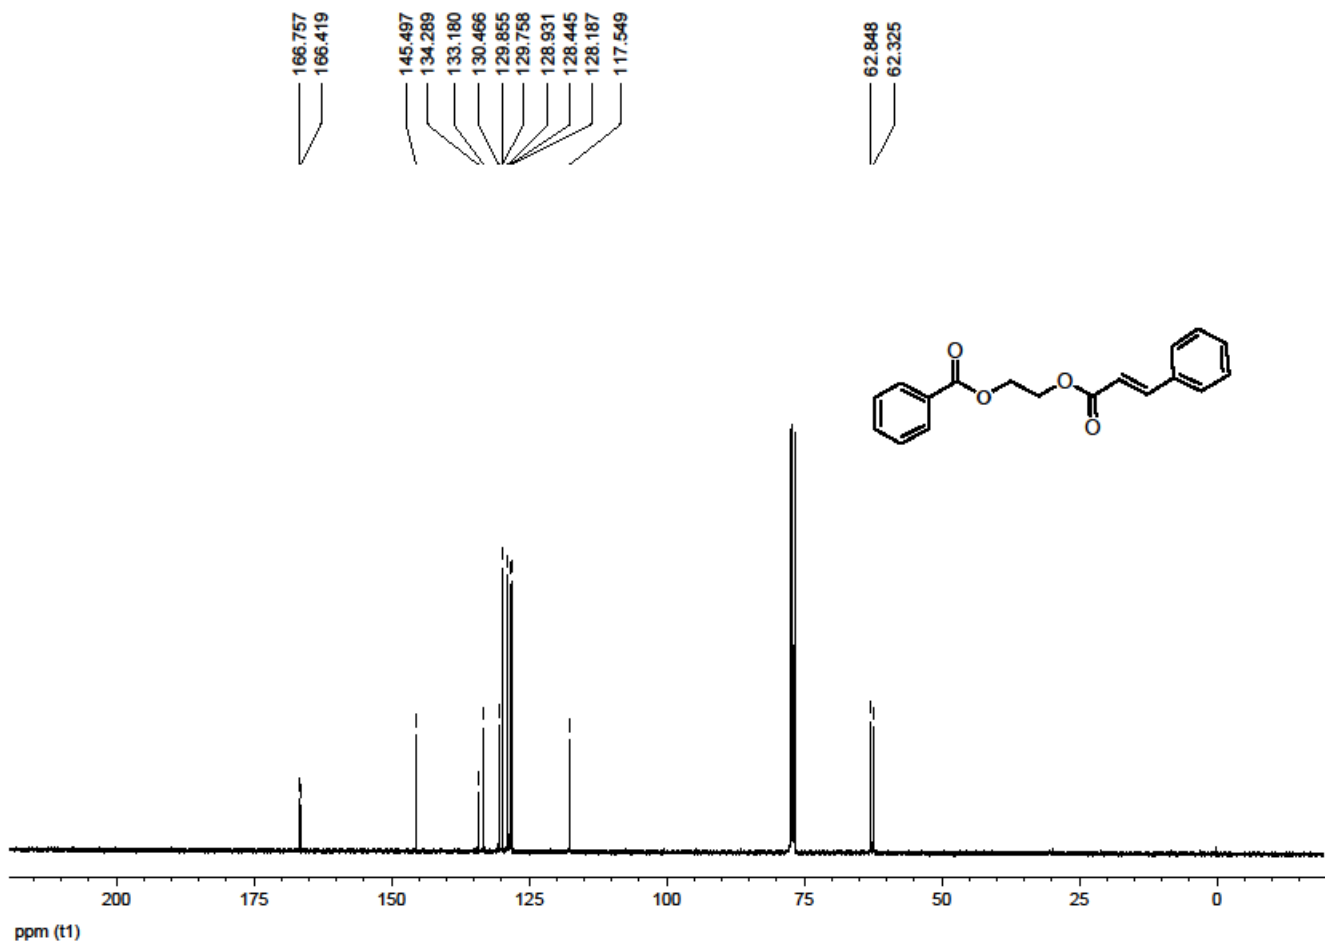

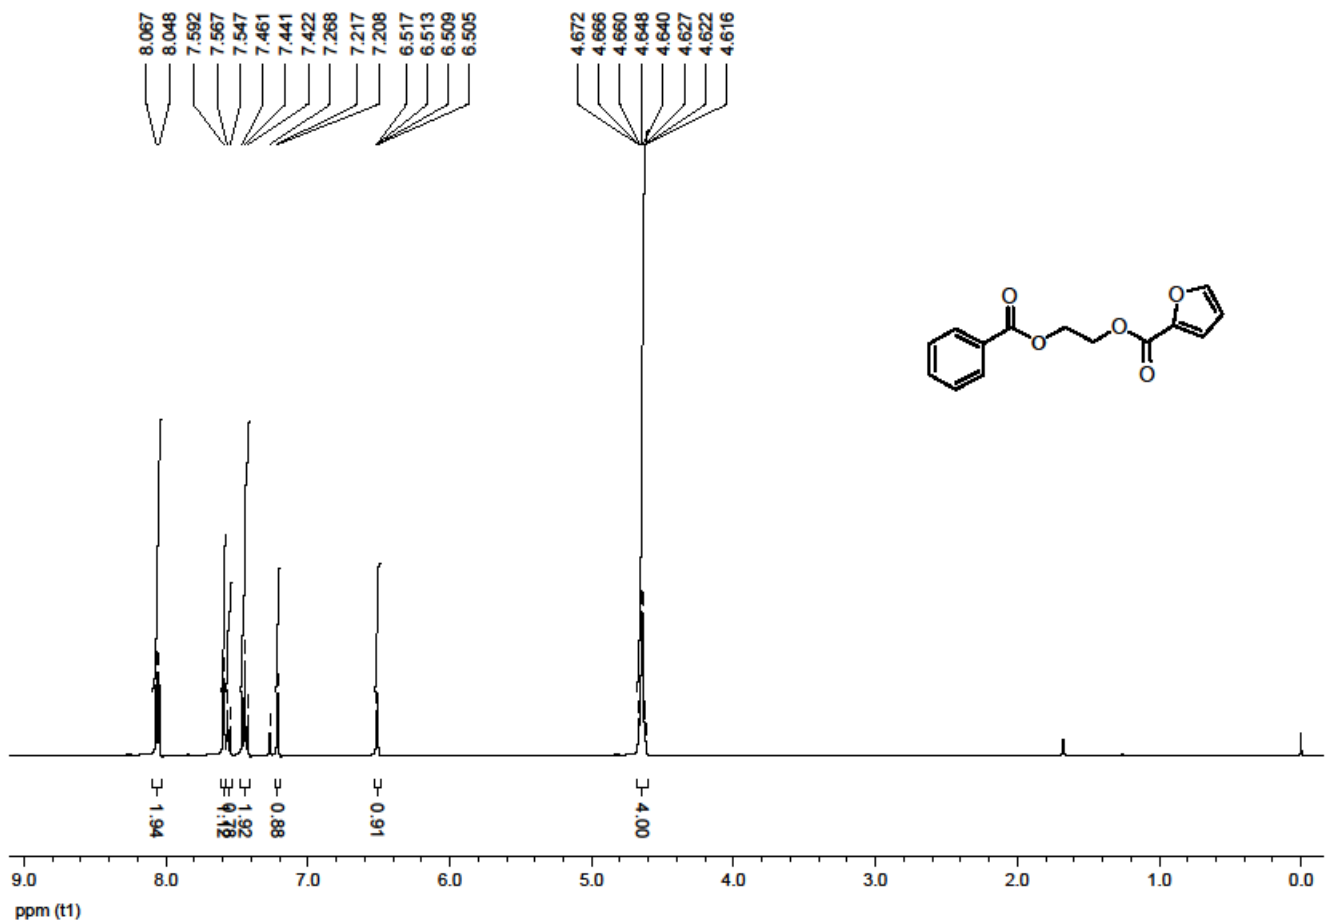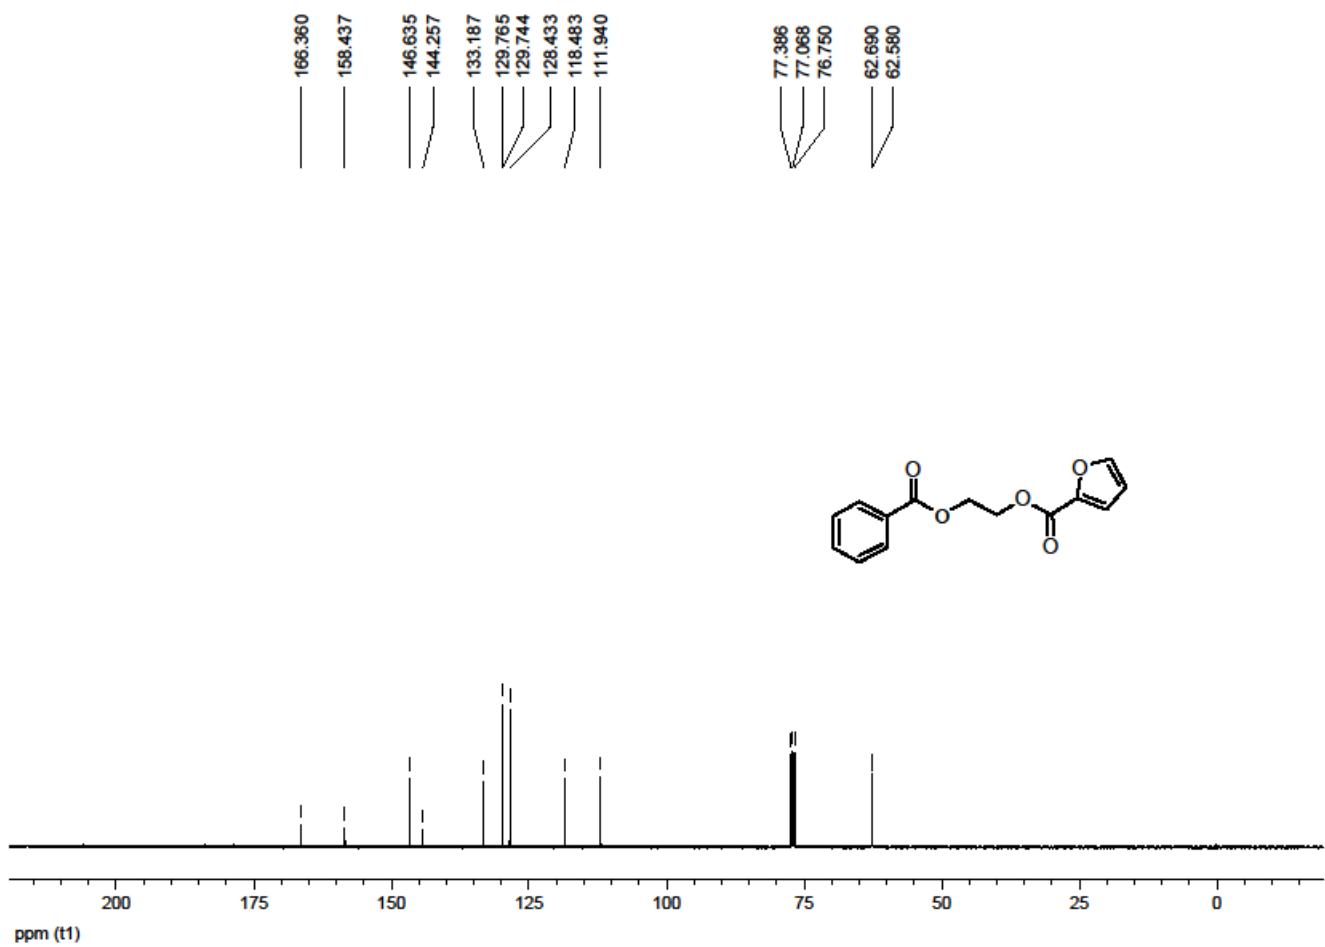



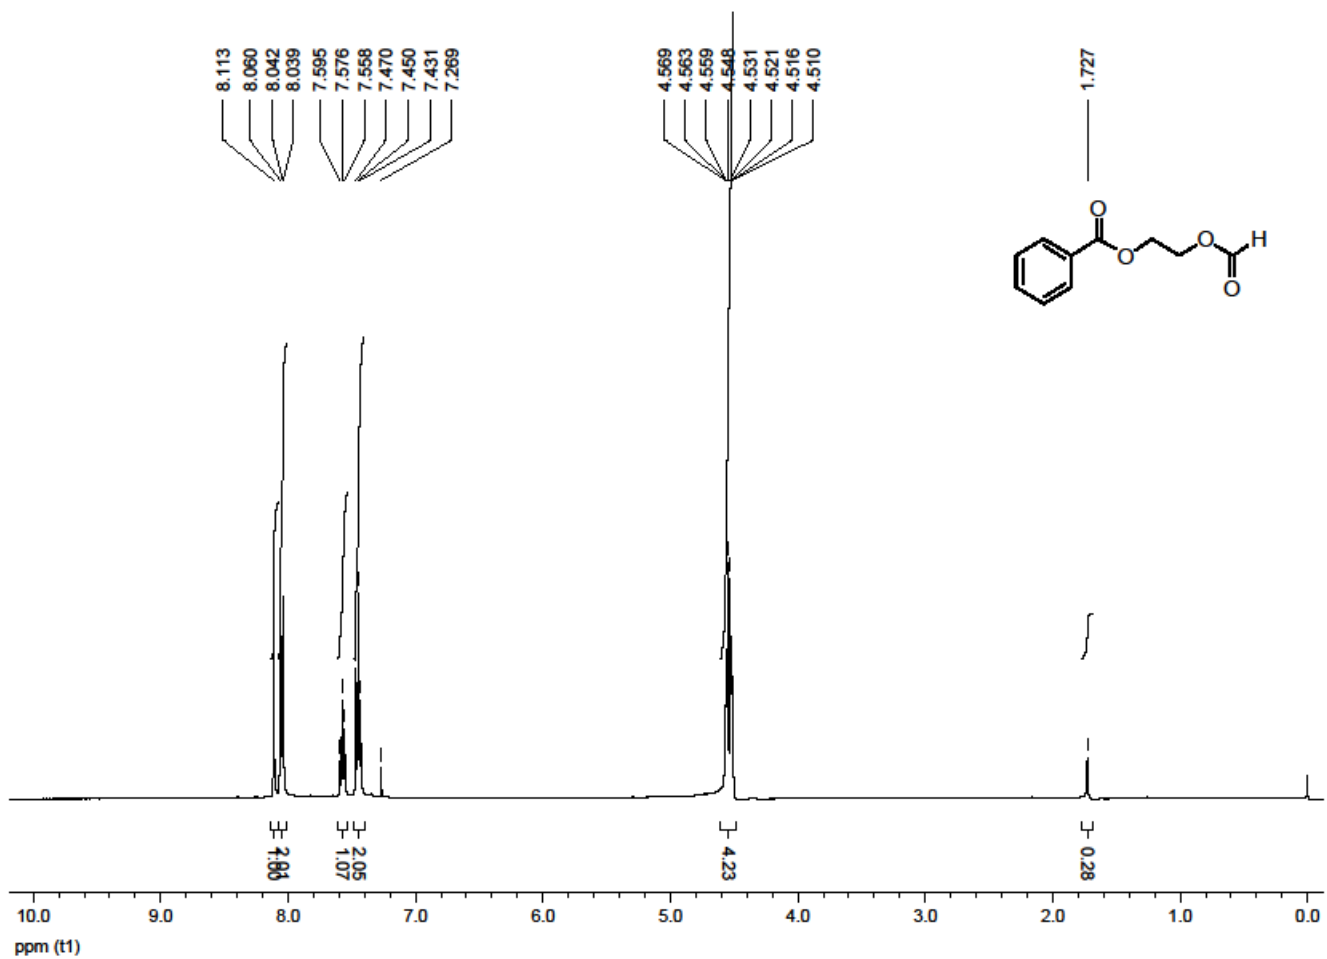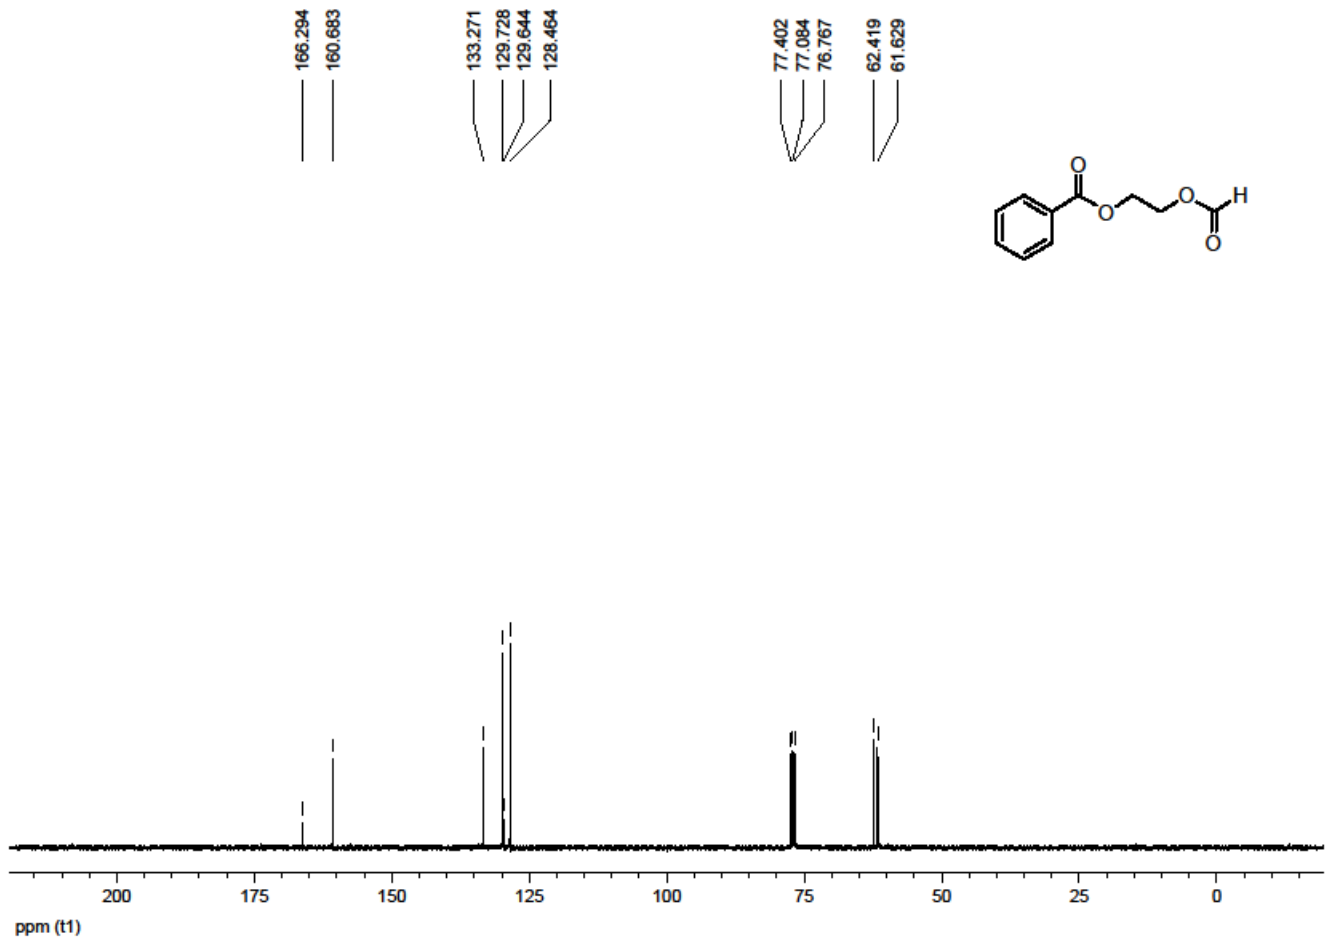

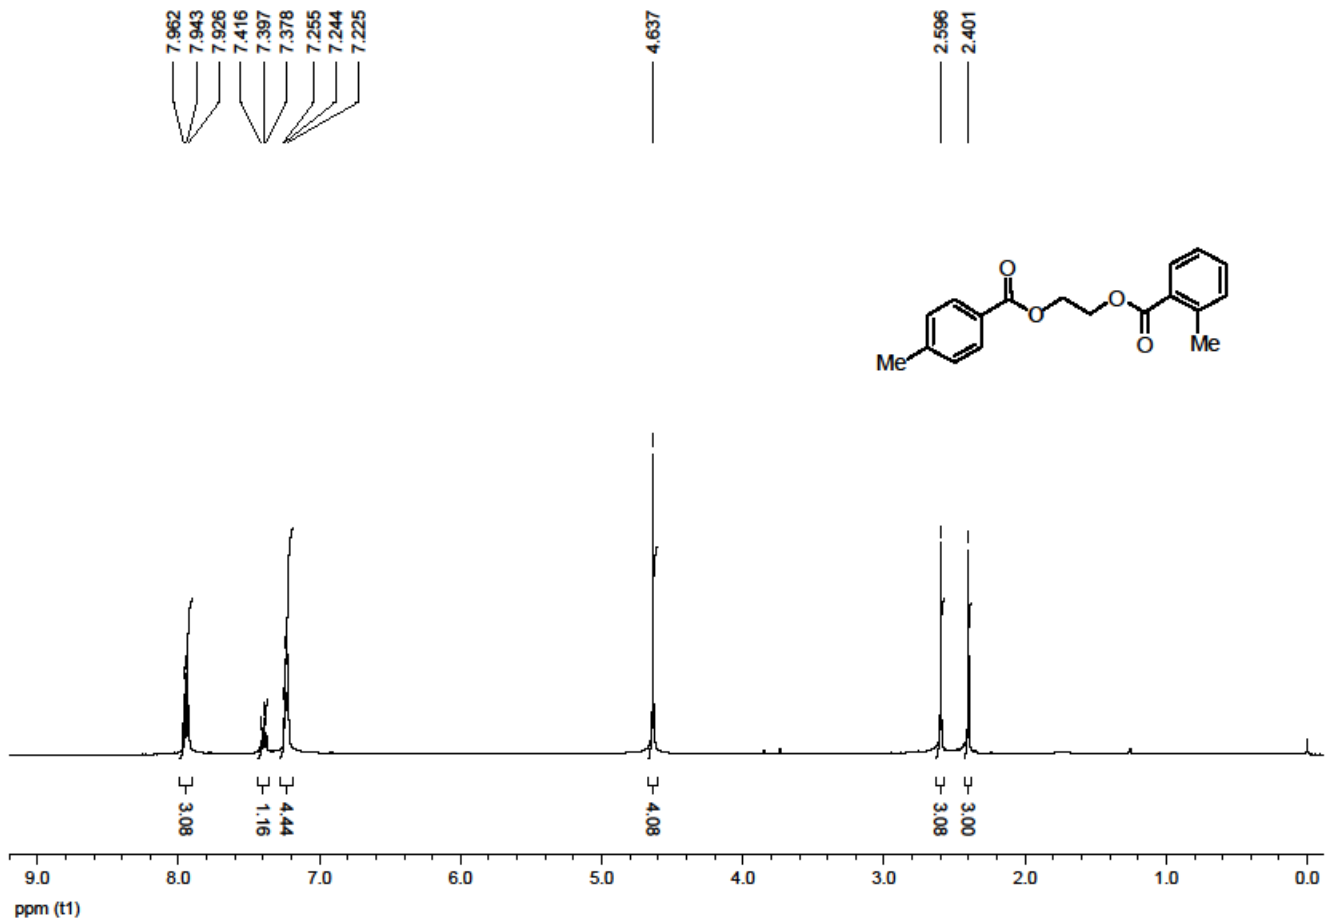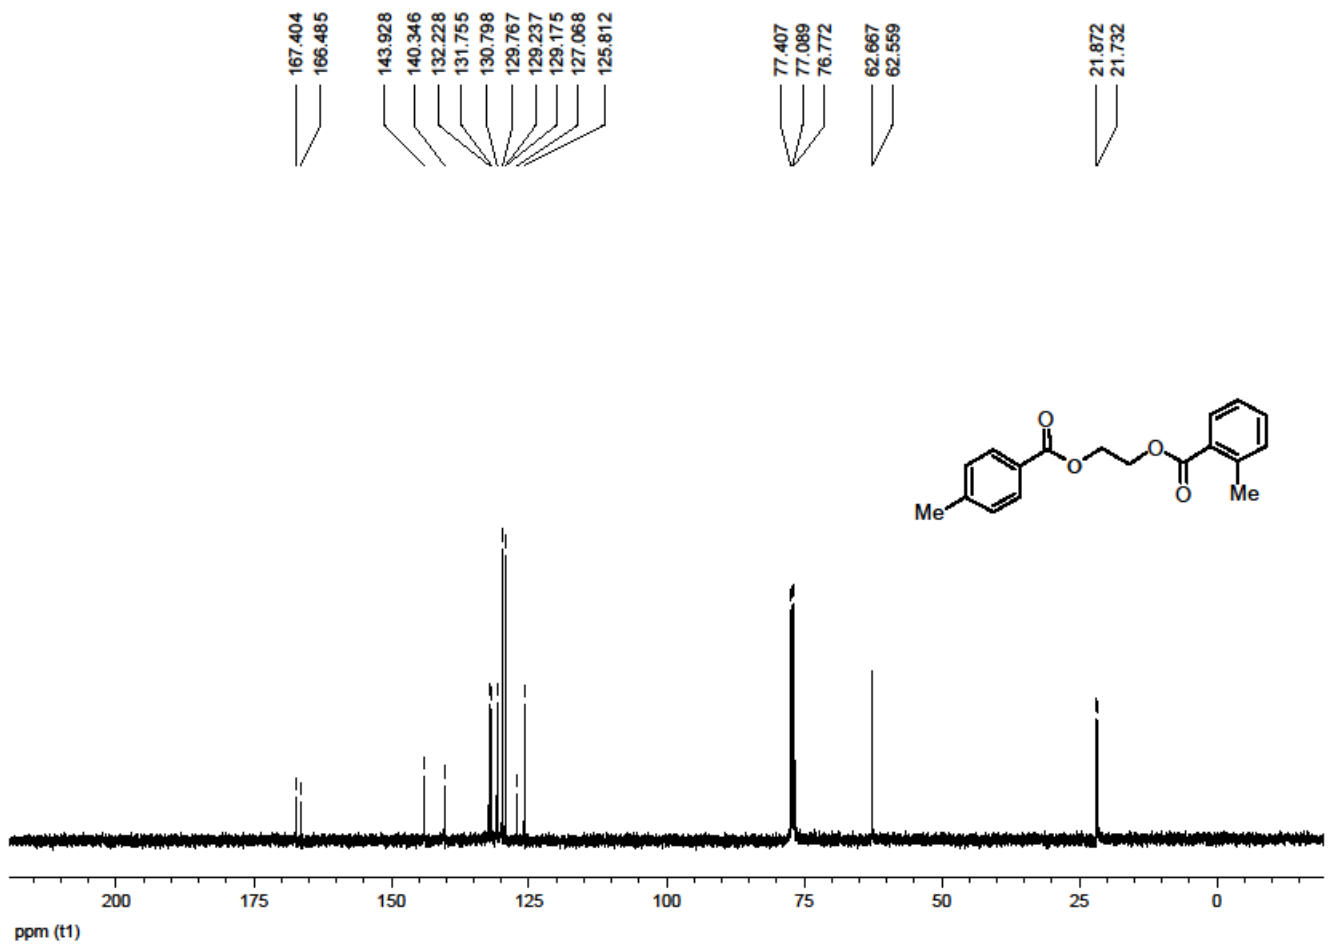

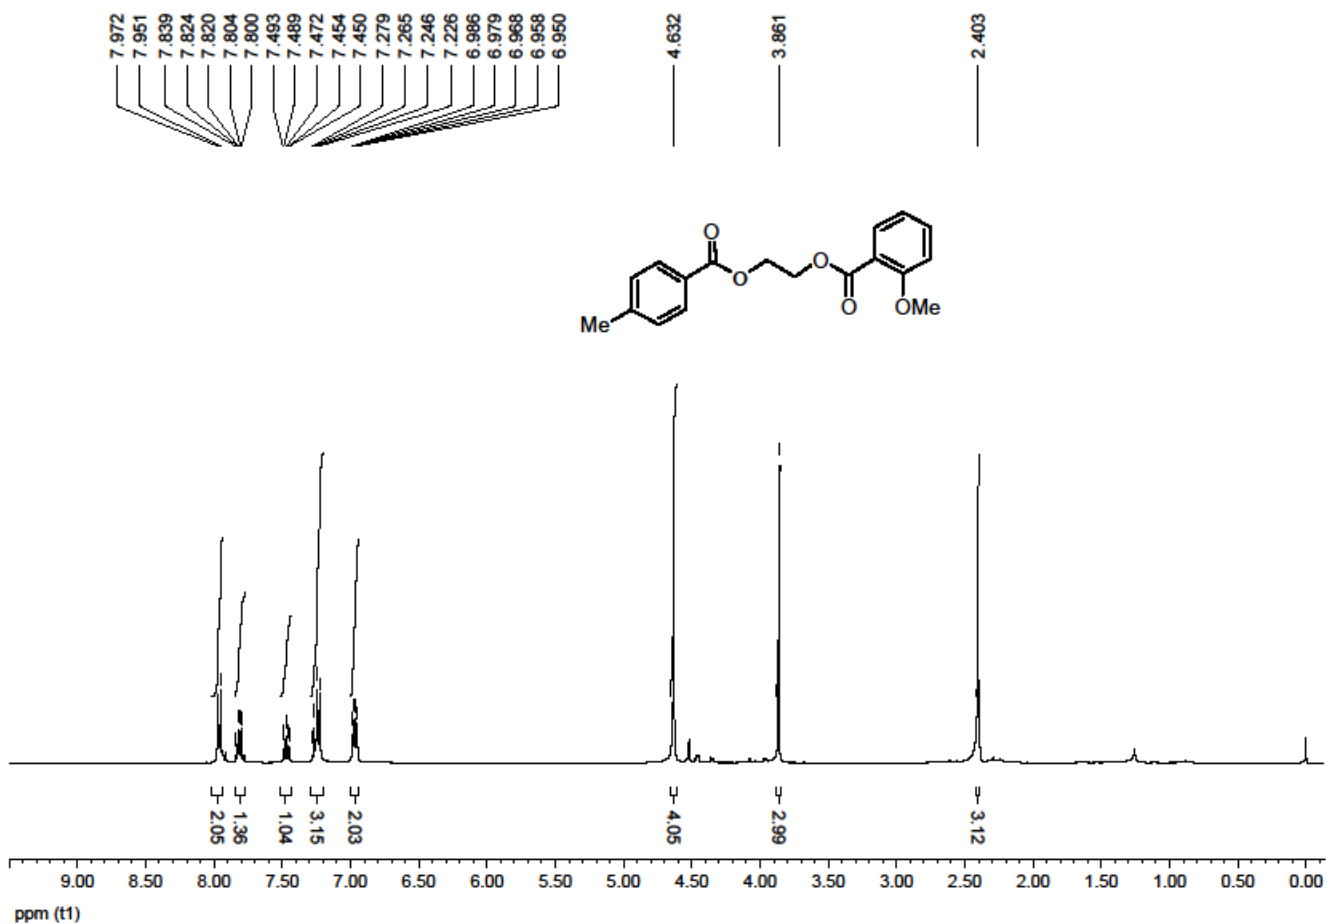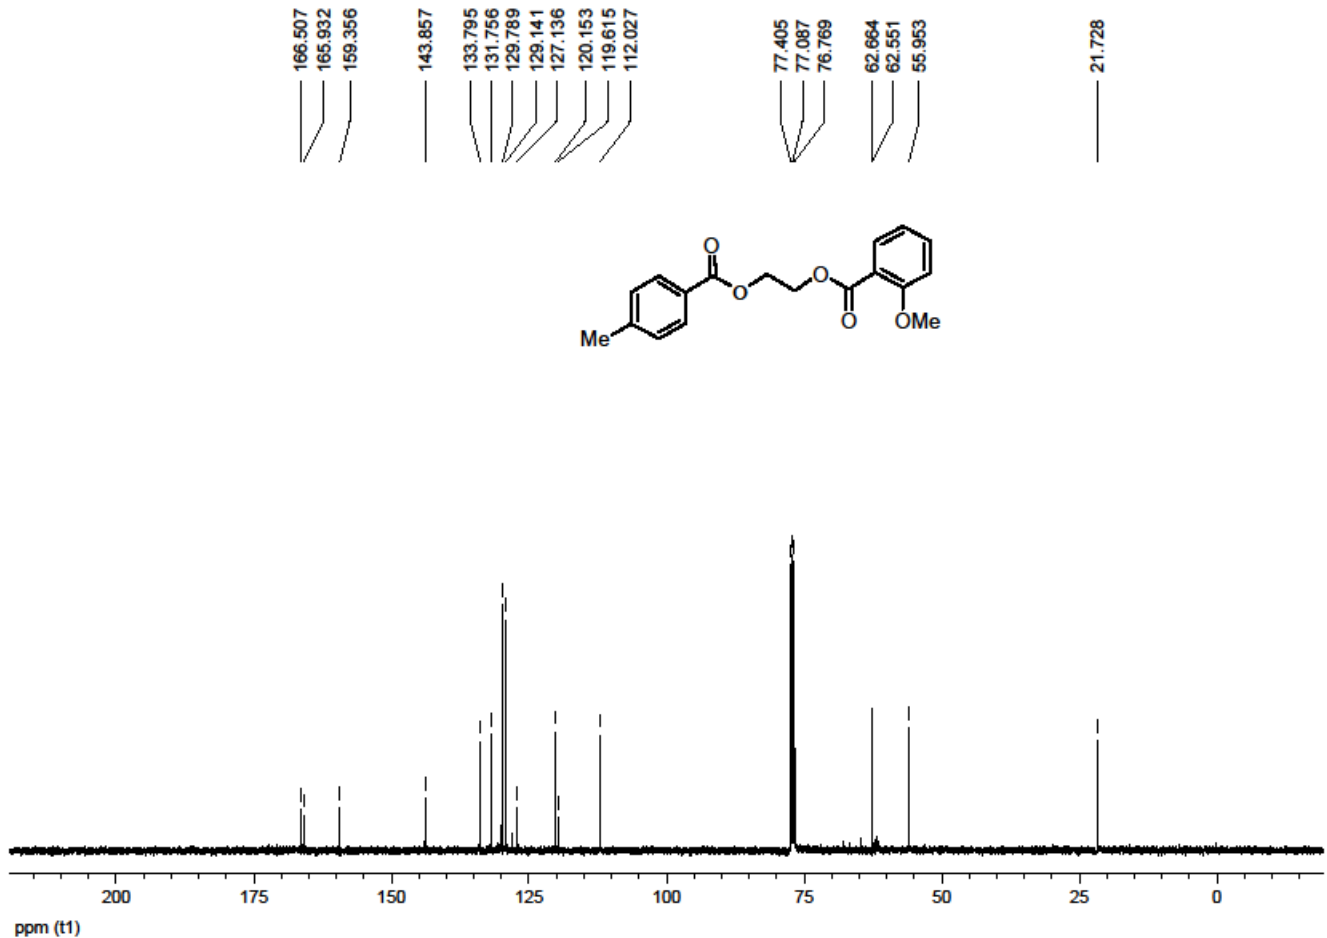

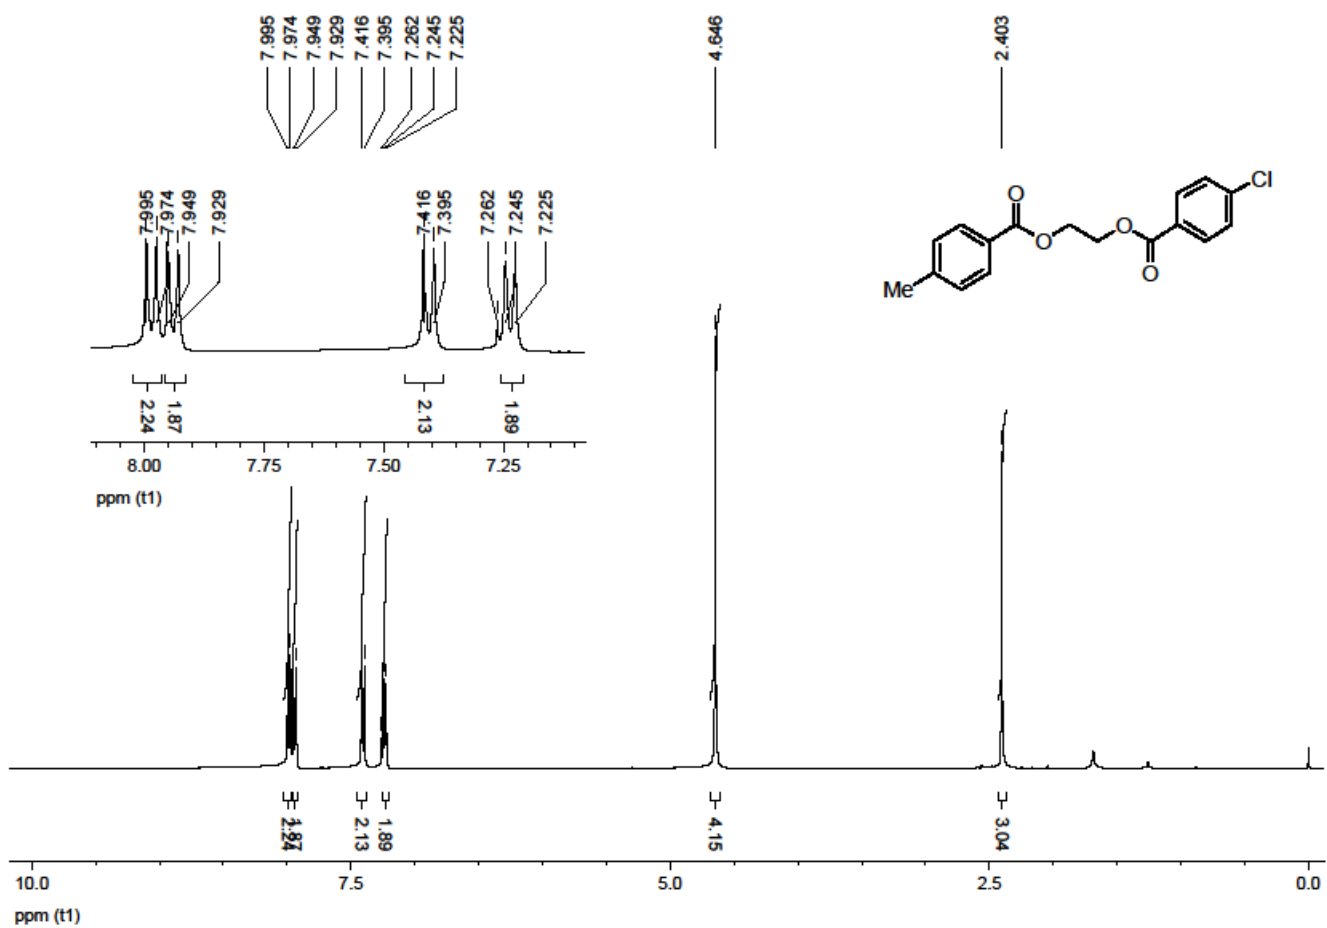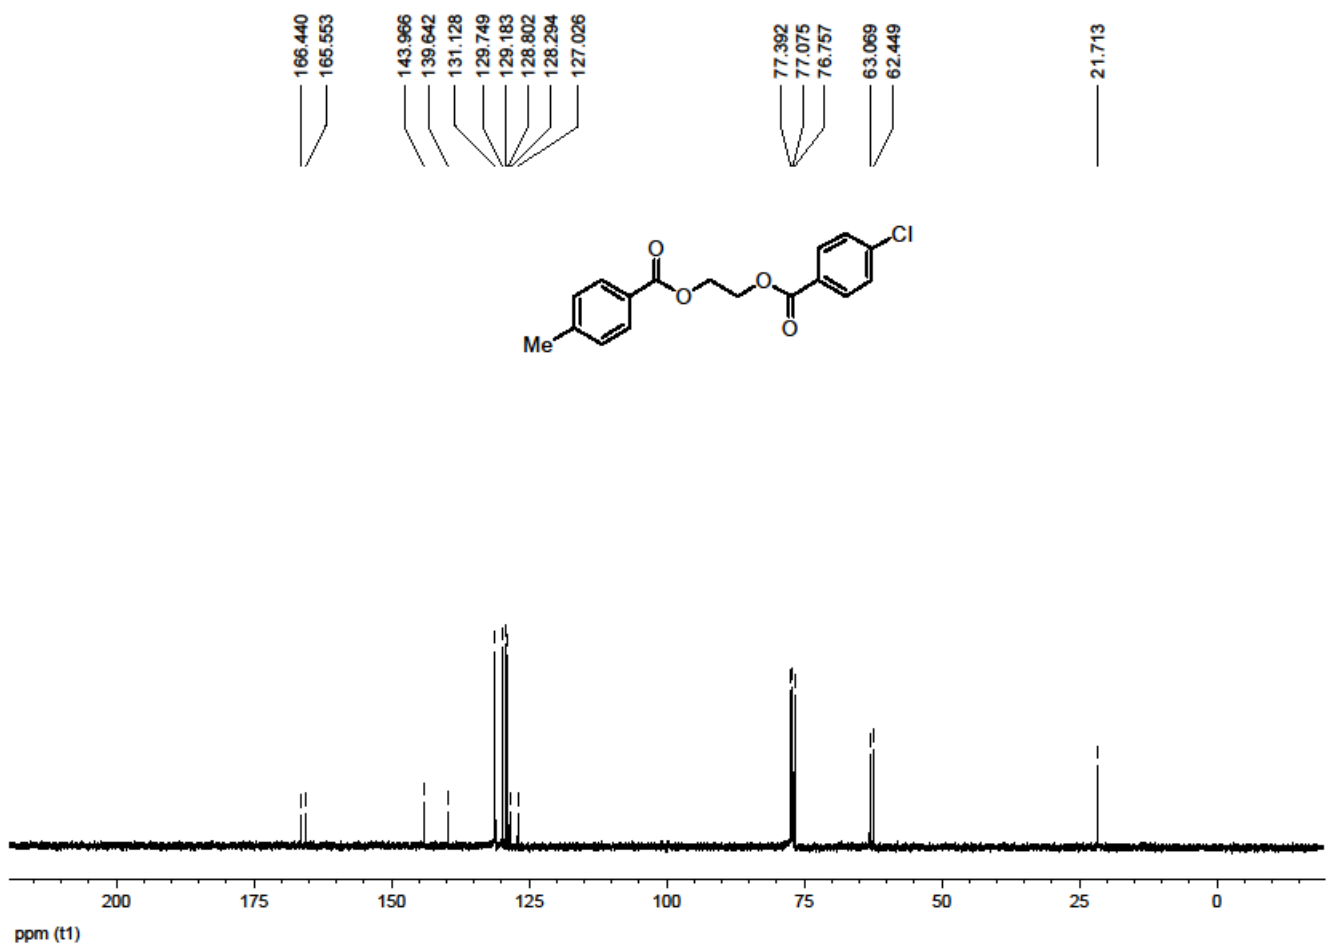

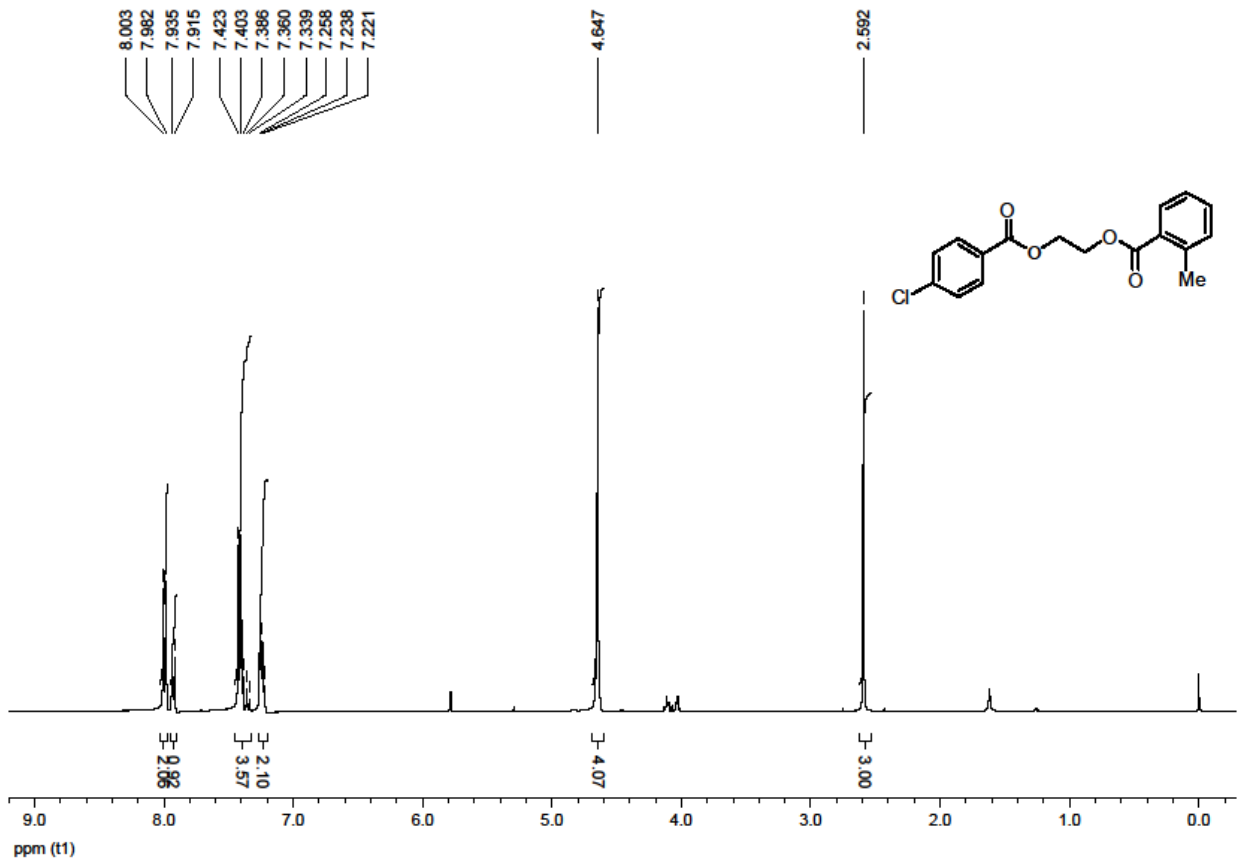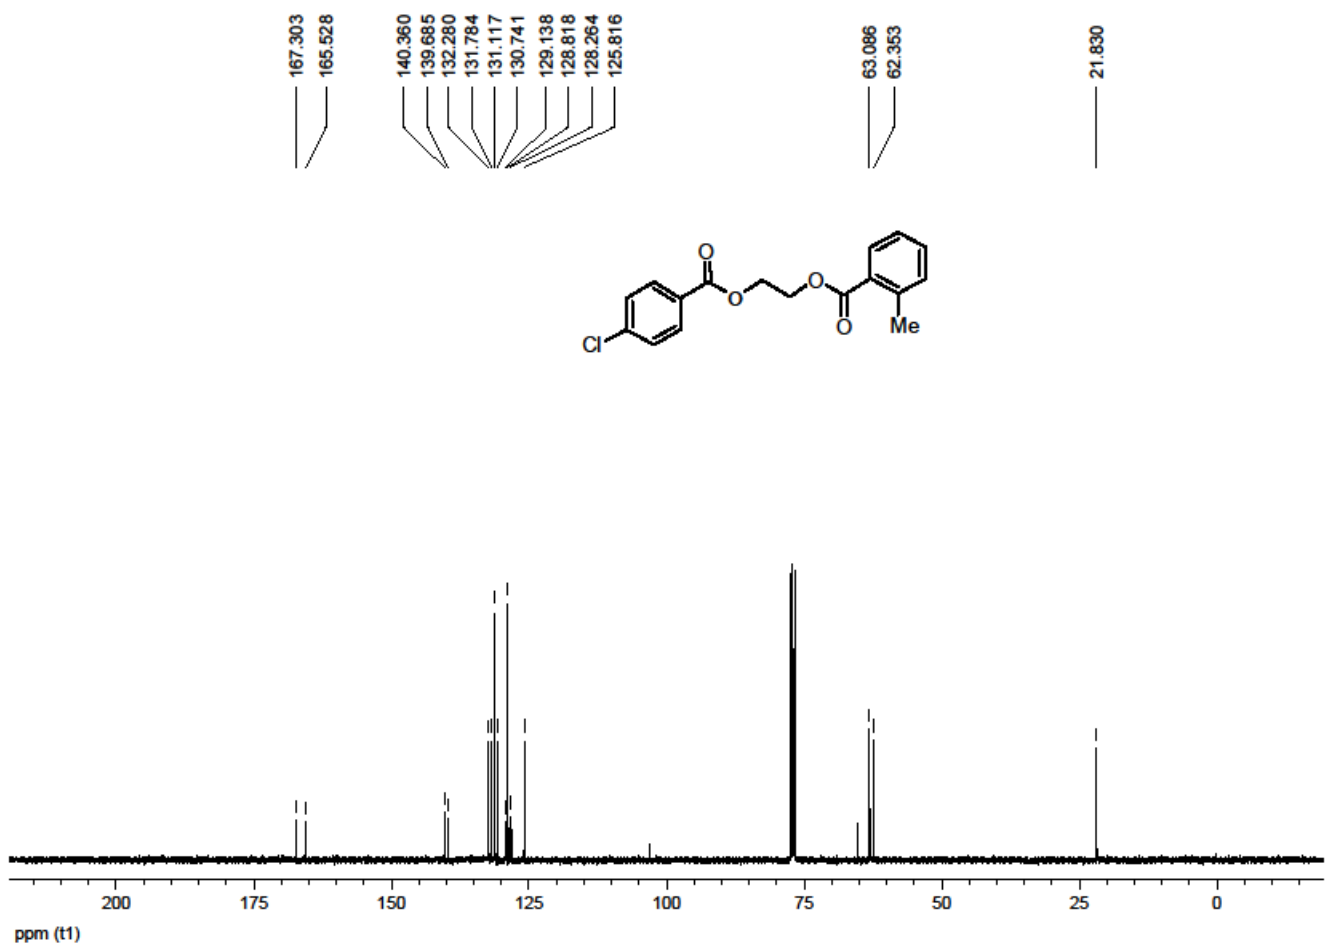

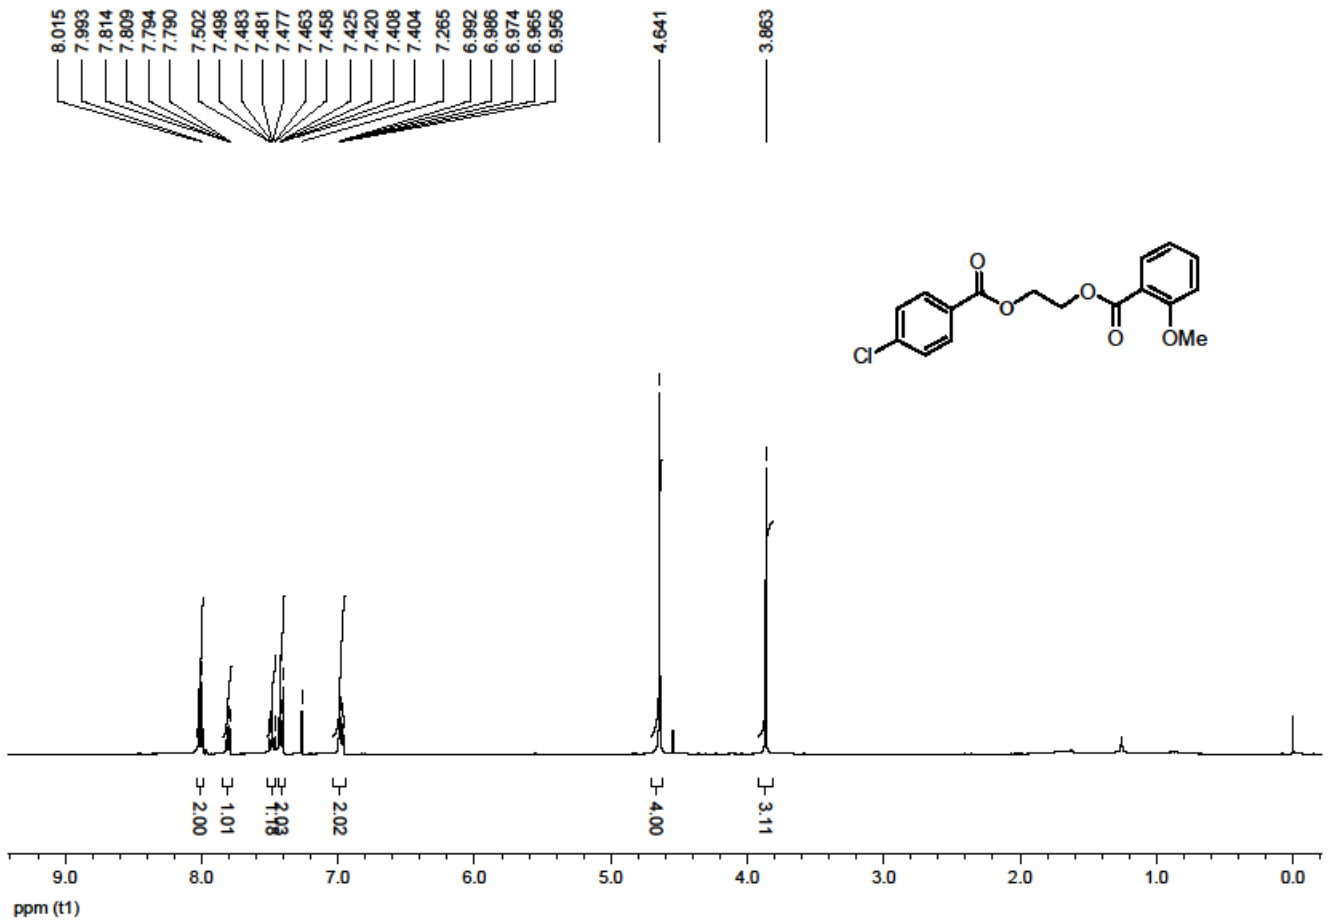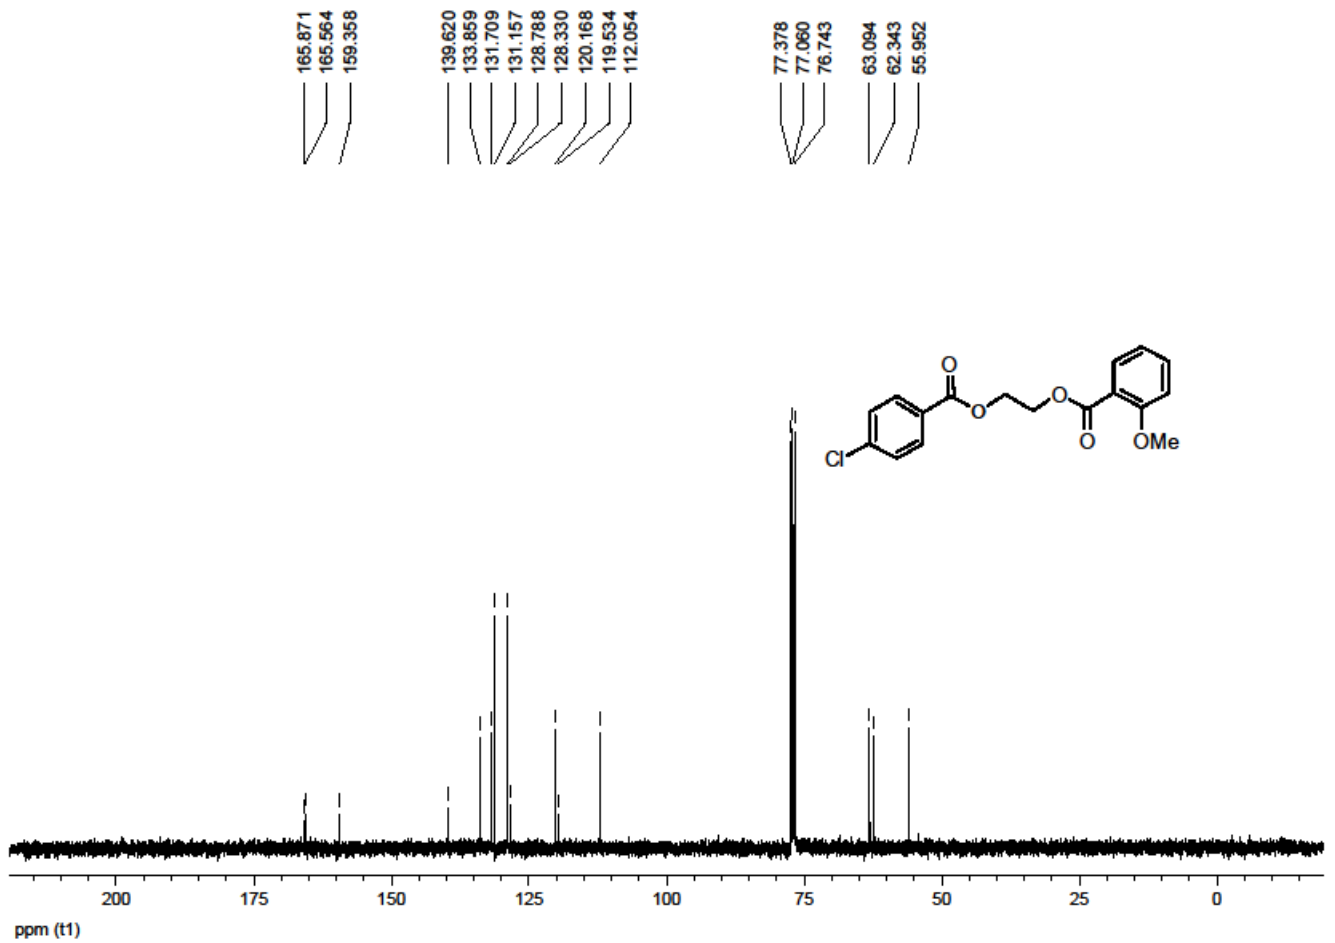

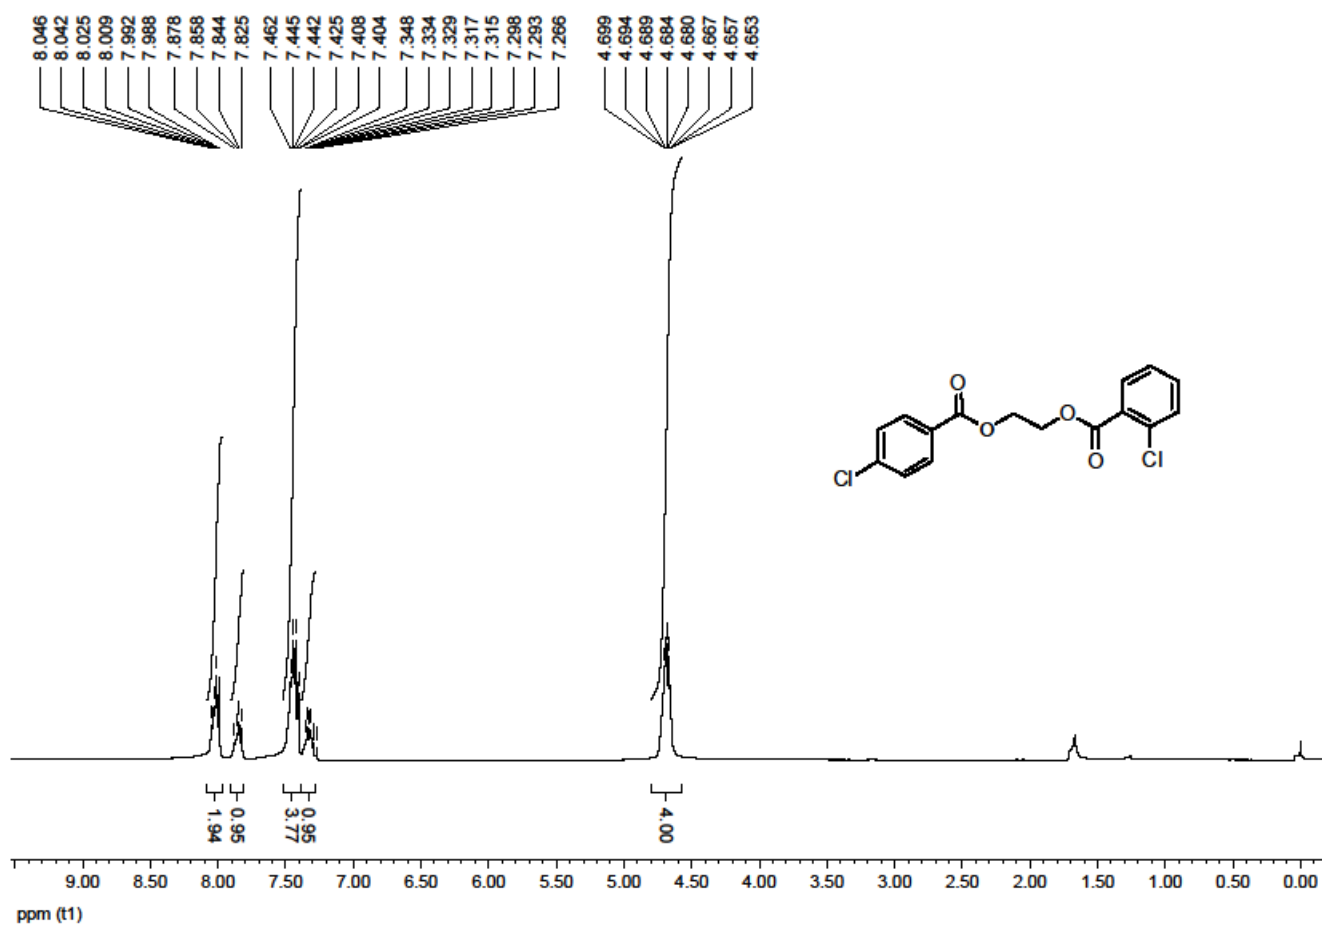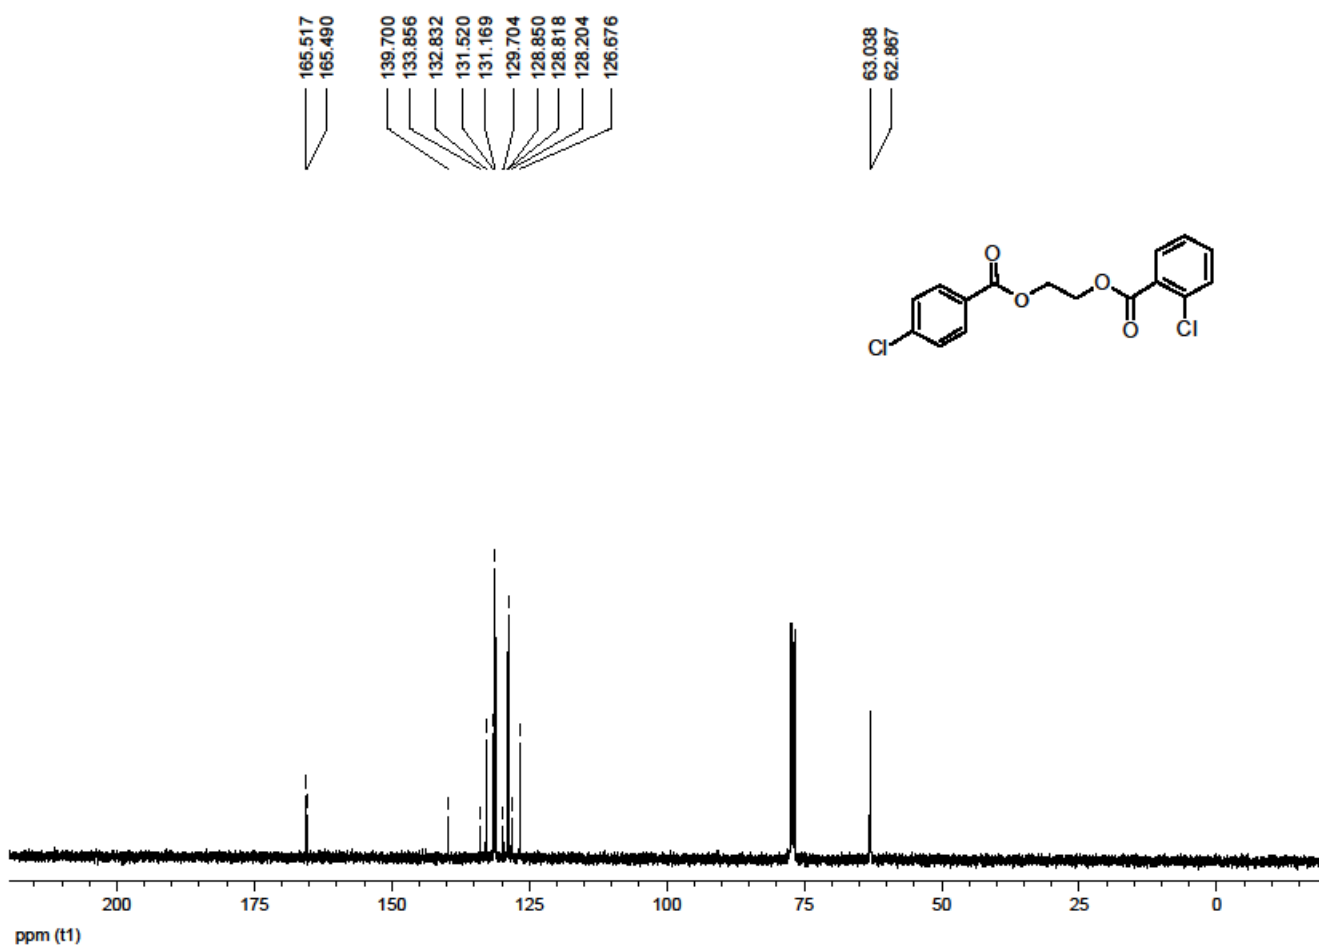

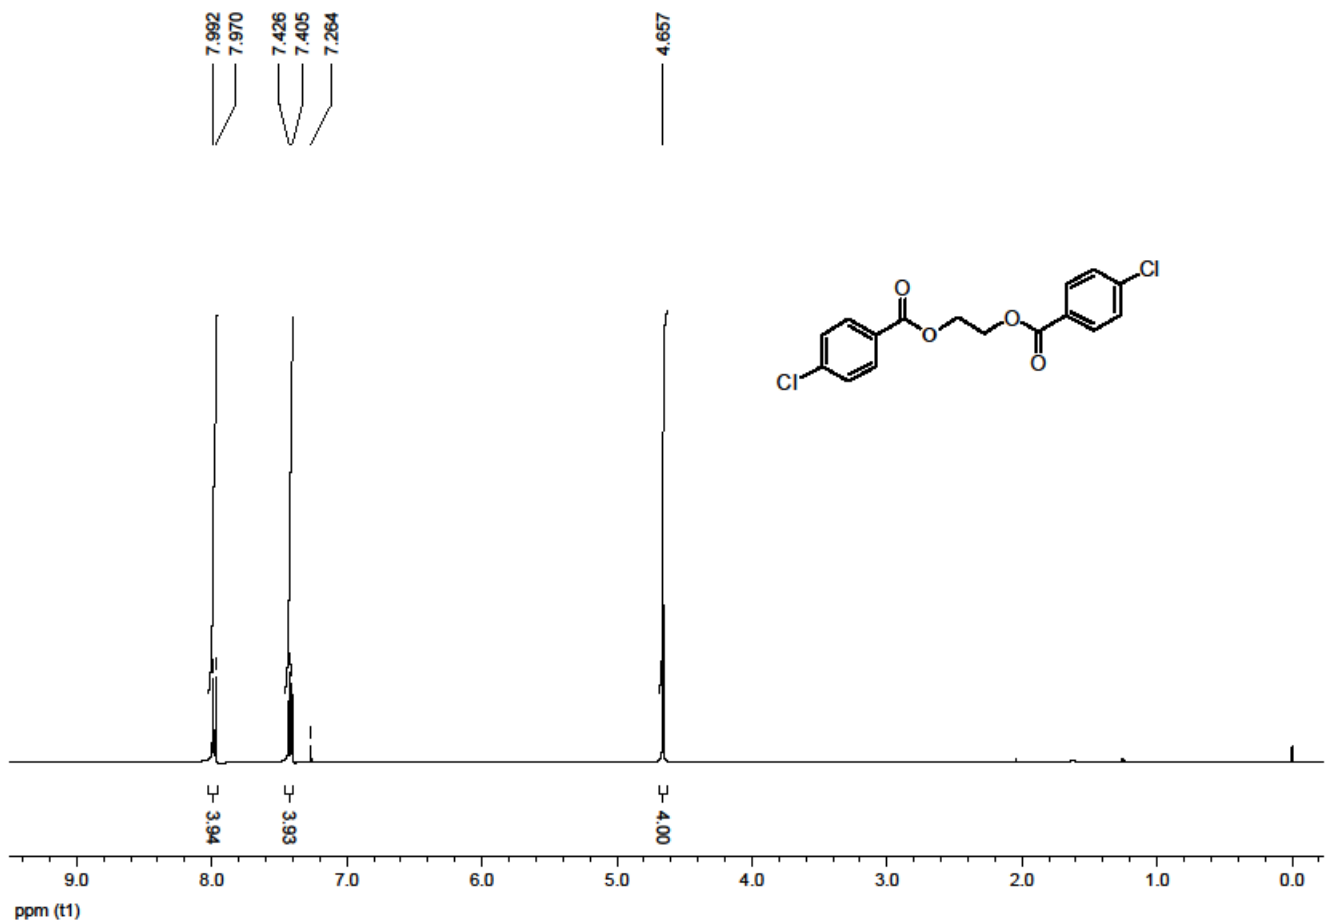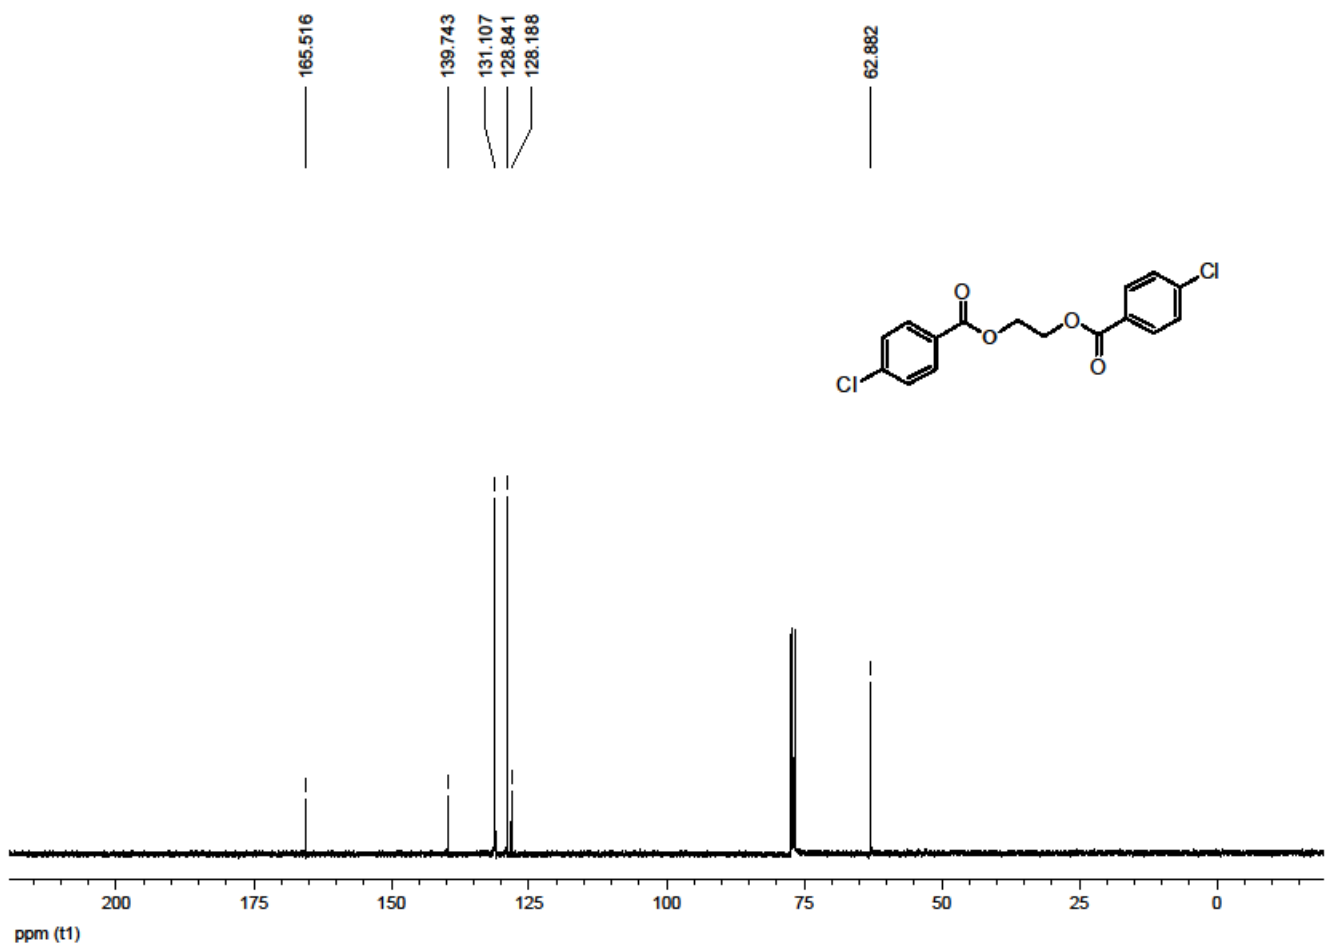



### 3) A checkCIF report regarding compound **3cm**

#### checkCIF/PLATON (standard)

You have not supplied any structure factors. As a result the full set of tests cannot be run.

THIS REPORT IS FOR GUIDANCE ONLY. IF USED AS PART OF A REVIEW PROCEDURE FOR PUBLICATION, IT SHOULD NOT REPLACE THE EXPERTISE OF AN EXPERIENCED CRYSTALLOGRAPHIC REFEREE.

No syntax errors found.

[CIF dictionary](#)

Please wait while processing ....

[Interpreting this report](#)

**Datablock: r131217f1**

Bond precision: C-C = 0.0023 A Wavelength=0.71073

Cell: a=7.7369(15) b=7.9449(16) c=12.788(3)  
alpha=104.35(3) beta=97.85(3) gamma=92.83(3)

Temperature: 173 K

|                | Calculated     | Reported       |
|----------------|----------------|----------------|
| Volume         | 751.6(3)       | 751.6(3)       |
| Space group    | P -1           | P-1            |
| Hall group     | -P 1           | ?              |
| Moiety formula | C16 H12 Cl2 O4 | ?              |
| Sum formula    | C16 H12 Cl2 O4 | C16 H12 Cl2 O4 |
| Mr             | 339.16         | 339.16         |
| Dx,g cm-3      | 1.499          | 1.499          |
| Z              | 2              | 2              |
| Mu (mm-1)      | 0.446          | 0.446          |
| F000           | 348.0          | 348.0          |
| F000'          | 348.76         |                |
| h,k,lmax       | 10,10,17       | 10,10,17       |
| Nref           | 4078           | 3946           |
| Tmin,Tmax      | 0.915,0.948    | 0.916,0.948    |
| Tmin'          | 0.915          |                |

Correction method= MULTI-SCAN

Data completeness= 0.968 Theta(max)= 29.200

R(reflections)= 0.0445( 2477) wR2(reflections)= 0.1075( 3946)

S = 1.010 Npar= Npar = 200

The following ALERTS were generated. Each ALERT has the format

**test-name\_ALERT\_alert-type\_alert-level.**

Click on the hyperlinks for more details of the test.

 **Alert level C**

PLAT029\_ALERT\_3\_C

\_diffn\_measured\_fraction\_theta\_full Low ..... 0.968

Note

---

● Alert level G

PLAT005\_ALERT\_5\_G No

\_iucr\_refine\_instructions\_details in the CIF Please  
Do !

PLAT066\_ALERT\_1\_G Predicted and Reported

Tmin&Tmax Range Identical ? Check

PLAT154\_ALERT\_1\_G The su's on the Cell Angles are  
Equal ..... 0.03000 Degree

---

0 **ALERT level A** = Most likely a serious problem -  
resolve or explain

0 **ALERT level B** = A potentially serious problem,  
consider carefully

1 **ALERT level C** = Check. Ensure it is not caused by an  
omission or oversight

3 **ALERT level G** = General information/check it is not  
something unexpected

2 ALERT type 1 CIF construction/syntax error,  
inconsistent or missing data

0 ALERT type 2 Indicator that the structure model may  
be wrong or deficient

1 ALERT type 3 Indicator that the structure quality may  
be low

0 ALERT type 4 Improvement, methodology, query or  
suggestion

1 ALERT type 5 Informative message, check

---

It is advisable to attempt to resolve as many as possible of the alerts in all categories. Often the minor alerts point to easily fixed oversights, errors and omissions in your CIF or refinement strategy, so attention to these fine details can be worthwhile. In order to resolve some of the more serious problems it may be necessary to carry out additional measurements or structure refinements. However, the purpose of your study may justify the reported deviations and the more serious of these should normally be commented upon in the discussion or experimental section of a paper or in the "special\_details" fields of the CIF. checkCIF was carefully designed to identify outliers and unusual parameters, but every test has its limitations and alerts that are not important

in a particular case may appear. Conversely, the absence of alerts does not guarantee there are no aspects of the results needing attention. It is up to the individual to critically assess their own results and, if necessary, seek expert advice.

### **Publication of your CIF in IUCr journals**

A basic structural check has been run on your CIF. These basic checks will be run on all CIFs submitted for publication in IUCr journals (*Acta Crystallographica*, *Journal of Applied Crystallography*, *Journal of Synchrotron Radiation*); however, if you intend to submit to *Acta Crystallographica Section C* or *E*, you should make sure that **full publication checks** are run on the final version of your CIF prior to submission.

### **Publication of your CIF in other journals**

Please refer to the *Notes for Authors* of the relevant journal for any special instructions relating to CIF submission.

---

**PLATON version of 05/02/2014; check.def file version of 05/02/2014**

**Datablock r131217f1 - ellipsoid plot**

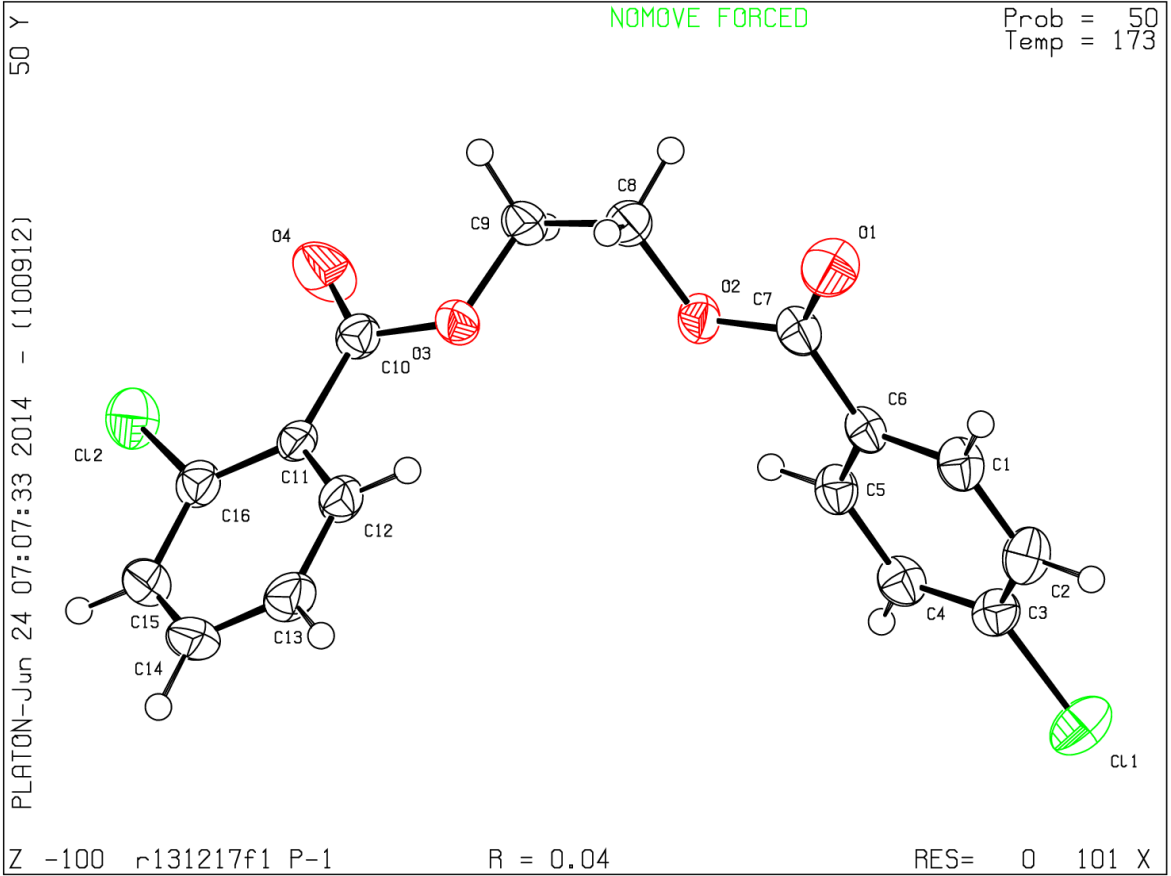

Supplement: c4ra08627a1.pdf [file c4ra08627a1.pdf]
